# Supplementary material
Source: PubMed Central journal article supplement (PMC2731549)
Supplement: NIHMS123309-supplement-Supplementary.pdf [file NIHMS123309-supplement-Supplementary.pdf]

## Supporting Information

### Impact of the modulation of electron-electron dipolar interaction on electron spin relaxation of nitroxide diradicals and tetraradical in glassy solvents between 10 and 300 K

Hideo Sato, Velavan Kathirvelu, Gaëlle Spagnol, Suchada Rajca, Andrzej Rajca, Sandra S. Eaton, and Gareth R. Eaton

Department of Chemistry and Biochemistry, University of Denver, Denver, CO 80208-2436 and  
Department of Chemistry, University of Nebraska, Lincoln, NE 68588-0304

#### Table of Content

- (1) Preparation of calix[4]arene nitroxide monoradical **1c**.
- (2) Table S1. *g* values and nitrogen hyperfine couplings
- (3) Figure S1. Saturation recovery curves and fit line calculated for a log-normal distributions of  $T_1$  for tetraradical **1a**, diradical **1b** and monoradical **1c** in 4:1 toluene:CHCl<sub>3</sub> at 50 K.
- (4) Figure S2: EPR spectrum of **2a** in EtOH/water (2:1) at 140 K.
- (5) Figure S3: Temperature dependence of dipolar splittings for **2a** in sucrose octaacetate.
- (6) Figure S4: Temperature dependence of exponent *x* (Equation [3]) for spin echo decays in 4:1 toluene:CHCl<sub>3</sub>.
- (7) Figure S5: Dependence of  $1/T_1$  on position in the spectrum of tempone and **2a** in glycerol or sucrose octaacetate at 86 K.
- (8) Figure S6: Dependence of  $1/T_1$  on position in the spectrum of **3** in 4:1 toluene:CHCl<sub>3</sub> or sucrose octaacetate at 86 K.
- (9) Discussion of Figures S5 and S6.
- (10) DFT calculations on nitroxide diradicals **4a**, anti-**4b**, and syn-**4b**.

#### Preparation of Calix[4]arene Nitroxide Monoradical **1c**.

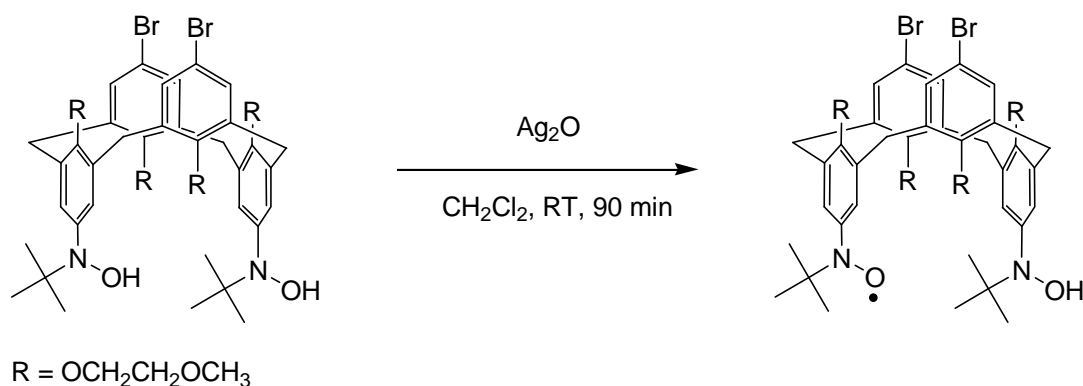

A solution of the dihydroxylamine (34.9 mg, 0.0353 mmol, 1 equiv) in degassed chloroform (3.0 mL) was added onto freshly prepared silver oxide (328 mg, 1.41 mmol, 40 equiv). The reaction mixture, protected from light, was stirred vigorously at room temperature for ~90 min. The crude mixture was centrifuged and the supernatant liquid was filtered through a 0.45- $\mu$ m filter (Fisher) to remove silver oxide. Concentration under reduced pressure gave a dark orange solid (33.1 mg), which was purified by flash chromatography (TLC-grade silica gel, gradient hexane/ether, 7:3 to 5:5). The silica pad was kept at low temperature, between -5 and 0 °C, by a sleeve filled with EtOH cooled with dry ice. The target material was collected as a pale orange pinkish band (1.3 mg). The EPR spectrum of **1c** in glassy 4:1 toluene:CHCl<sub>3</sub> is shown in Figure 5a, top trace. The *g* and *A* values are included in Table S1.

**Table S1**

g values and Nitrogen Hyperfine Couplings

| Sample                           | Temp (K) | $g_{xx}, g_{yy}, g_{zz}$ | $A_{zz}$ (G) <sup>a</sup> |
|----------------------------------|----------|--------------------------|---------------------------|
| Toluene: CHCl <sub>3</sub> (4:1) |          |                          |                           |
| <b>1b</b> (di)                   | 50       | 2.0093, 2.0058, 2.0026   | 15.4 <sup>b</sup>         |
| <b>1c</b> (mono)                 | 60       | 2.0091, 2.0056, 2.0024   | 30.8                      |
| <b>2a</b> (di)                   | 70       | 2.0089, 2.0055, 2.0024   | 12.5                      |
| <b>2b</b> (di)                   | 50       | 2.0091, 2.0060, 2.0025   | 12                        |
| sucrose octaacetate              |          |                          |                           |
| <b>1b</b> (di)                   | 294      | 2.0080, 2.0043, 2.0022   | 15.4 <sup>b</sup>         |
| <b>2a</b> (di)                   | 294      | 2.0089, 2.0054, 2.0025   | 12.5                      |
| <b>2a</b> (di) <sup>c</sup>      | 86       | 2.0087, 2.0050, 2.0021   | 12.7                      |
| <b>2b</b> (di)                   | 294      | 2.0089, 2.0054, 2.0025   | 12.5                      |

<sup>a</sup> Hyperfine values  $A_{xx}$  and  $A_{yy}$  were not resolved but were assumed to be in the range of 2 to 3 G, which is half the value for the monoradical.

<sup>b</sup>  $A_{zz}$  was not resolved in the spectrum and was assumed to be half the value for the monoradical.

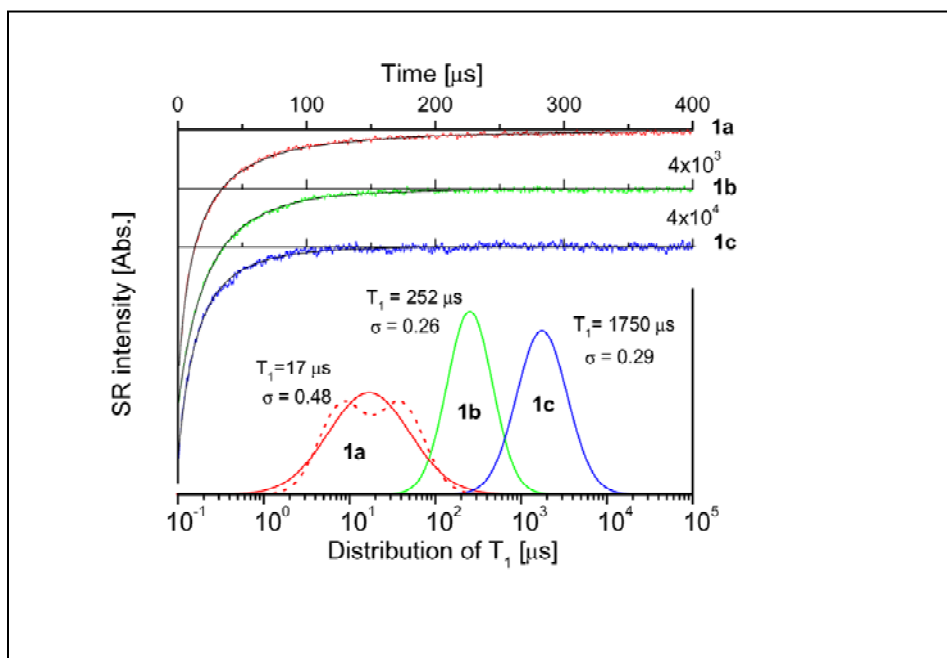

**Figure S1.** Saturation recovery curves and fit line calculated for a log-normal distributions of  $T_1$  for tetradical **1a**, diradical **1b** and monoradical **1c** in 4:1 toluene: $\text{CHCl}_3$  at 50 K. The distributions, distribution widths and values of  $T_1$  are shown in the lower part of the figure. An alternate modeling of the data for tetradical **1a** as the sum of two distributions is also shown.

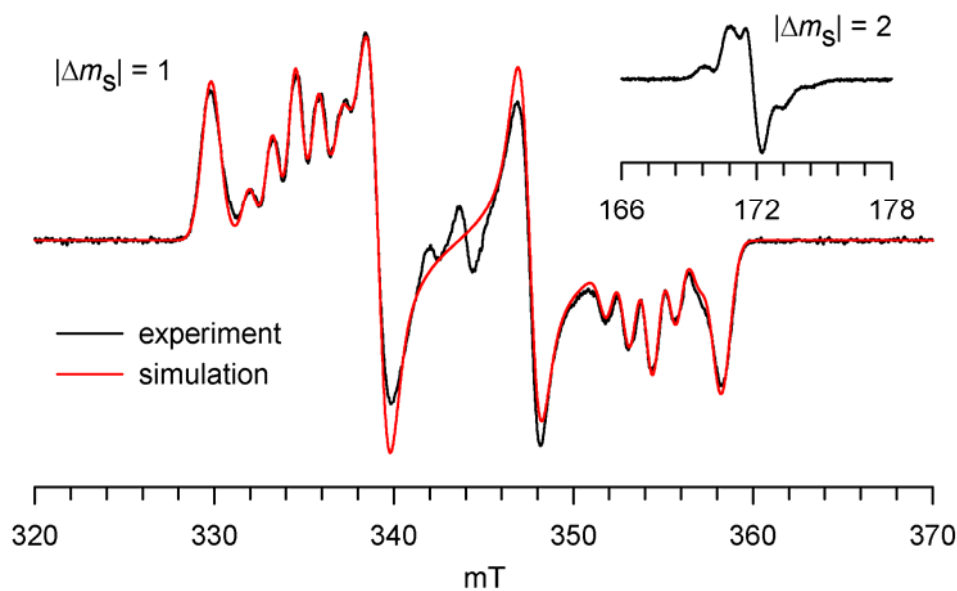

**Figure S2.** EPR (X-Band, 9.6545 GHz) spectrum of 0.7 mM nitroxide diradical **2a** in ethanol/water (2 : 1) at 140 K. The spectral simulation of the  $|\Delta m_S| = 1$  region is shown as red trace. The fitting parameters for the spectral simulation to the  $S = 1$  state are:  $|D/hc| = 1.328 \times 10^{-2} \text{ cm}^{-1}$ ,  $|E/hc| = 1.75 \times 10^{-3} \text{ cm}^{-1}$ ,  $|A_{yy}/2hc| = 1.20 \times 10^{-3} \text{ cm}^{-1}$ ,  $g_x = 2.0086$ ,  $g_y = 2.0022$ ,  $g_z = 2.0051$ , Gaussian line ( $L_x = 10 \text{ G}$ ,  $L_y = 7.5 \text{ G}$ ,  $L_z = 10 \text{ G}$ ). The center lines correspond to an  $S = 1/2$  (monoradical) impurity. The molecular  $x$ -,  $y$ -, and  $z$ -axes for this spectral simulation are set to correspond to the increasing values of the principal components for the spin-spin magnetic dipole tensor, as implemented in WINEPR SimFonia 1.25.

a.

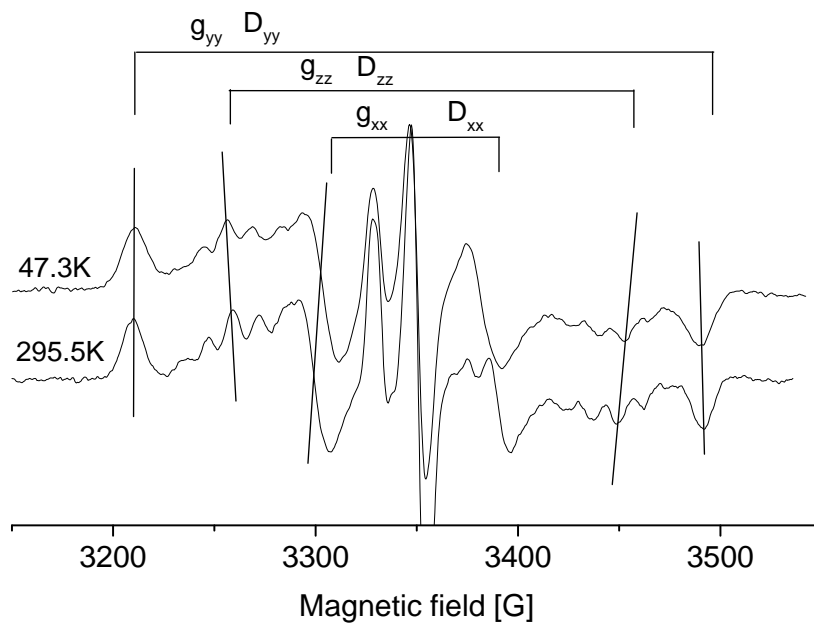

b.

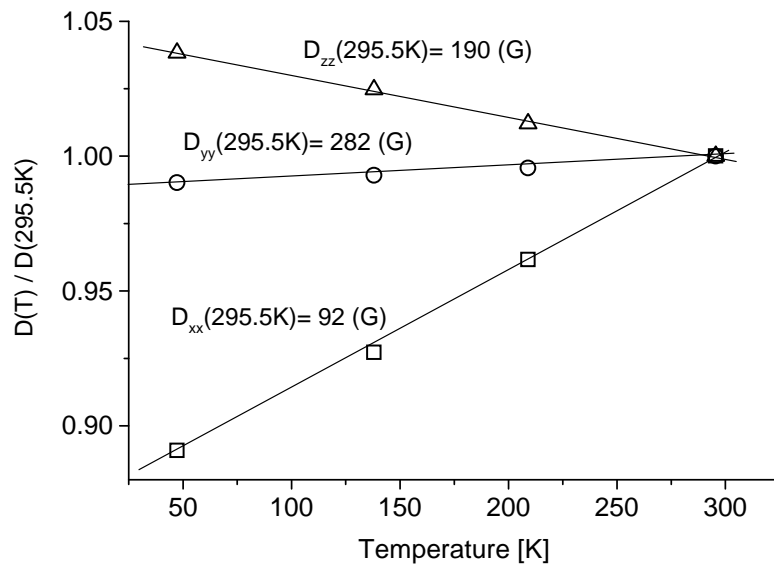

**Figure S3.** (a) Temperature dependence of X-band CW spectra of diradical **2a** in sucrose octaacetate; (b) temperature dependence of dipolar couplings  $D_{xx}$ ,  $D_{yy}$  and  $D_{zz}$  normalized to the values at 295.5 K.

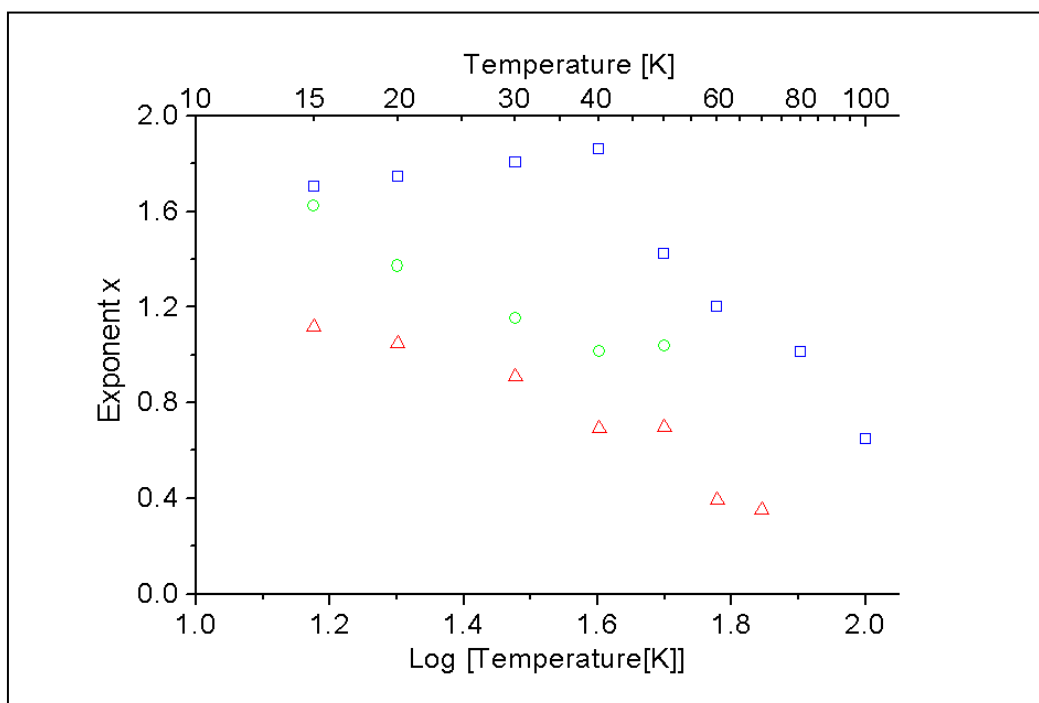

**Figure S4:** Temperature dependence of exponent  $x$  (Equation [3]) for spin echo decays for ( $\Delta$ ) tetradical **1a**, ( $\circ$ ) diradical **1b**, and ( $\square$ ) monoradical **1c** in 4:1 toluene:CHCl<sub>3</sub>.

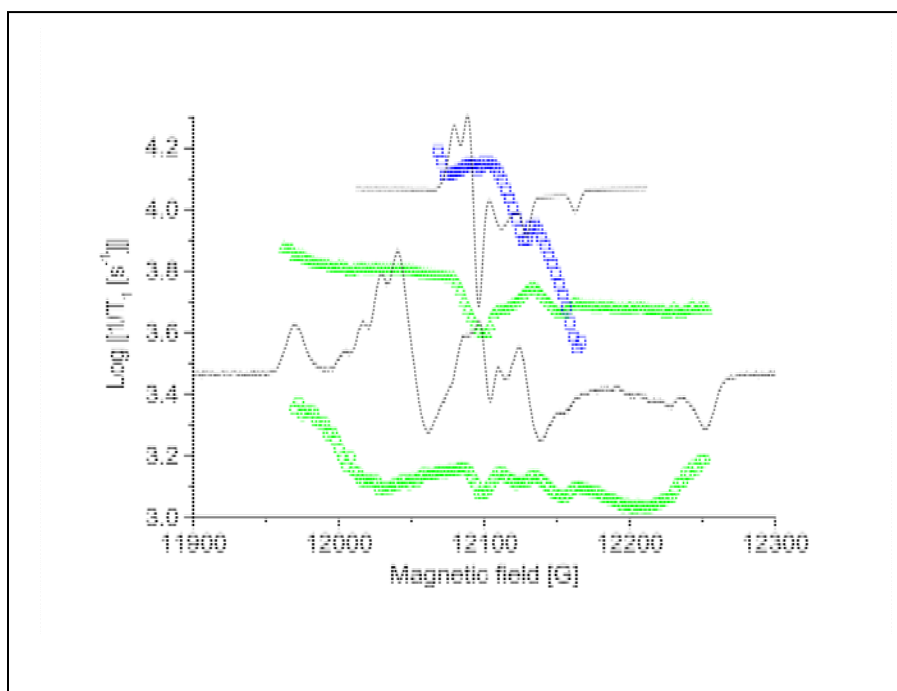

**Figure S5.** Dependence of  $1/T_1$  on position in Q-band spectra at 86 K: ( $\square$ ) tempone in sucrose octaacetate, ( $\circ$ ) diradical **2a** in glycerol, and ( $\Delta$ ) diradical **2a** in sucrose octaacetate. Relaxation rates were estimated by a single exponential fit. The relaxation rates are superimposed on CW spectra in sucrose octaacetate.

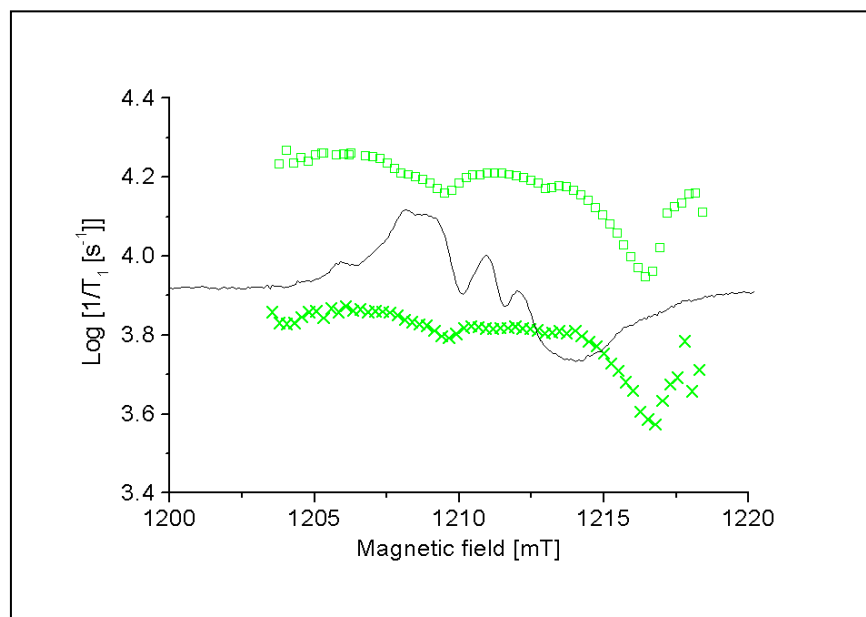

**Figure S6.** Dependence of  $1/T_1$  on position for diradical **3** in Q-band spectra at 86 K: ( $\square$ ) in sucrose octaacetate and ( $\times$ ) in 4:1 toluene: $\text{CHCl}_3$ . Relaxation rates were estimated by a single exponential fit. The relaxation rates are superimposed on CW spectra in sucrose octaacetate.

#### Discussion of Figures S5 and S6.

**Dependence of  $1/T_1$  on Position in the CW Spectra.** To enhance orientation selectivity these experiments were performed primarily at Q-band. The variation with position in the spectrum of  $1/T_1$  for nitroxide radicals has been reported at X-band.<sup>1</sup> The maximum rates, which are observed near  $g_{xx}$  and  $g_{yy}$ , are about a factor of 4 faster than the minimum rates that are observed at  $g_{zz}$ . This dependence is clearly resolved at Q-band for tempone in sucrose octaacetate at 86 K (Figure S5) where the Raman process is the dominant contribution to  $1/T_1$ . The rates are similar at X-band and Q-band as expected for the Raman process. This orientation dependence, which persists with increasing temperature until the tumbling process dominates, is due to the orientation dependence of spin-orbit coupling or of vibrations.<sup>1</sup>

The relaxation rates for diradical **2a** in the relatively rigid glycerol glass at 86 K at Q-band are shown in Figure S5. The variation with position in the spectrum is only about a factor of 2, which is substantially smaller than for mono-nitroxides. Rates are faster toward the extremes of the spectrum, which is along the  $g_{yy}$  axis of the nitroxide and slower near the  $g_{zz}$  axis, as in the monoradical. The slightly slower relaxation at the monoradical position (the center of the spectrum) is due to the overlap of the monoradical contribution (**2a\_mono**). In sucrose octaacetate, the relaxation for **2a** is faster than in glycerol due to a larger contribution from modulation of the dipole-dipole interaction, which is not strongly dependent on the position in the spectrum (Figure S5). In toluene: $\text{CHCl}_3$  solution at X-band the relaxation rates at 50 K for **1b**, **2a**, **2b** show little orientation dependence, similar to that observed for diradical **2a** in sucrose octaacetate.

Well-defined half-field transitions were observed for the diradicals.<sup>2</sup> At 15 to 80 K it was not possible to observe a spin echo, which is attributed to short values of  $T_m$ . Values of  $T_1$  were measured by saturation recovery. Signal-to-noise is lower than for the allowed transitions so higher observe powers were used at half-field to observe the recovery, which introduces additional uncertainty in the values. Within that uncertainty, values of  $T_1$  at half-field are similar to those for the allowed transitions. In CW experiments it has been observed that it is more difficult to saturate the half-field transitions than the allowed transitions.<sup>3</sup> The present results show that the difference in power saturation of the

transitions is not due to differences in  $T_1$ , but must arise from shorter  $T_2$  and/or the low transition probability for the forbidden transition.

The small dependence of  $1/T_1$  on position in the spectrum for **3** is shown in figure S6. The orientation dependence is much less than for monoradicals. Since the nitroxyl rings are non-planar the z axes, which are long the p- $\pi$  orbital of the nitroxyl nitrogen are not coincident. When the magnetic field is along the z axis for one half of the diradical, which would give a longer  $T_1$  for the monoradical, the field is at an intermediate orientation for the other half of the diradical which would give a shorter  $T_1$ . Thus the exchange interaction averages the extremes of monoradical relaxation times.

- (1) Du, J.-L.; Eaton, G. R.; Eaton, S. S. *J. Magn. Reson. A* 1995, 115, 213.
- (2) Rajca, A.; Mukherjee, S.; Pink, M.; Rajca, S. *J. Am. Chem. Soc.* 2006, 128, 13497.
- (3) Eaton, S. S.; Eaton, G. R. *J. Amer. Chem. Soc.* 1982, 104, 5002.

### DFT calculations on nitroxide diradical anti-4b at the UB3LYP/6-31G(d) level with Gaussian 03.

File: DiNO\_C5dft.log

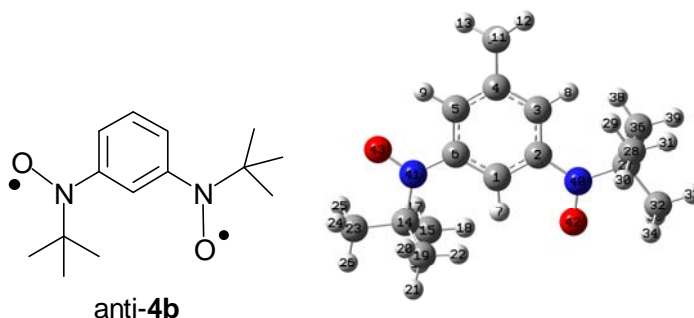

```

*****
Gaussian 03:  IA32W-G03RevC.02 12-Jun-2004
               04-Oct-2007
*****
%chk=DiNO_C5dft.chk
%mem=8MW
%nproc=1
Will use up to 1 processors via shared memory.
-----
# opt=tight freq ub3lyp/6-31g(d) geom=connectivity
-----

SCF Done:  E(UB+HF-LYP) = -845.876631256      A.U. after 4 cycles
              Convg = 0.6886D-08              -V/T = 2.0096
              S**2 = 2.0318

Annihilation of the first spin contaminant:
S**2 before annihilation 2.0318, after 2.0005

Item          Value      Threshold  Converged?
Maximum Force 0.000000   0.000015   YES
RMS Force     0.000000   0.000010   YES
Maximum Displacement 0.000115   0.000060   NO
RMS Displacement 0.000021   0.000040   YES
Predicted change in Energy=-5.713851D-12
Optimization completed on the basis of negligible forces.
-- Stationary point found.

-----
!   Optimized Parameters   !

```

! (Angstroms and Degrees) !

| ! Name | Definition | Value    | Derivative | Info. | ! |
|--------|------------|----------|------------|-------|---|
| ! R1   | R(1,2)     | 1.4069   | -DE/DX =   | 0.0   | ! |
| ! R2   | R(1,6)     | 1.3988   | -DE/DX =   | 0.0   | ! |
| ! R3   | R(1,7)     | 1.0747   | -DE/DX =   | 0.0   | ! |
| ! R4   | R(2,3)     | 1.406    | -DE/DX =   | 0.0   | ! |
| ! R5   | R(2,40)    | 1.4211   | -DE/DX =   | 0.0   | ! |
| ! R6   | R(3,4)     | 1.4017   | -DE/DX =   | 0.0   | ! |
| ! R7   | R(3,8)     | 1.0799   | -DE/DX =   | 0.0   | ! |
| ! R8   | R(4,5)     | 1.3909   | -DE/DX =   | 0.0   | ! |
| ! R9   | R(4,10)    | 1.5127   | -DE/DX =   | 0.0   | ! |
| ! R10  | R(5,6)     | 1.4119   | -DE/DX =   | 0.0   | ! |
| ! R11  | R(5,9)     | 1.0817   | -DE/DX =   | 0.0   | ! |
| ! R12  | R(6,41)    | 1.4179   | -DE/DX =   | 0.0   | ! |
| ! R13  | R(10,11)   | 1.098    | -DE/DX =   | 0.0   | ! |
| ! R14  | R(10,12)   | 1.0959   | -DE/DX =   | 0.0   | ! |
| ! R15  | R(10,13)   | 1.0941   | -DE/DX =   | 0.0   | ! |
| ! R16  | R(14,15)   | 1.5427   | -DE/DX =   | 0.0   | ! |
| ! R17  | R(14,19)   | 1.5428   | -DE/DX =   | 0.0   | ! |
| ! R18  | R(14,23)   | 1.537    | -DE/DX =   | 0.0   | ! |
| ! R19  | R(14,41)   | 1.519    | -DE/DX =   | 0.0   | ! |
| ! R20  | R(15,16)   | 1.0955   | -DE/DX =   | 0.0   | ! |
| ! R21  | R(15,17)   | 1.0952   | -DE/DX =   | 0.0   | ! |
| ! R22  | R(15,18)   | 1.0909   | -DE/DX =   | 0.0   | ! |
| ! R23  | R(19,20)   | 1.0952   | -DE/DX =   | 0.0   | ! |
| ! R24  | R(19,21)   | 1.0955   | -DE/DX =   | 0.0   | ! |
| ! R25  | R(19,22)   | 1.091    | -DE/DX =   | 0.0   | ! |
| ! R26  | R(23,24)   | 1.0919   | -DE/DX =   | 0.0   | ! |
| ! R27  | R(23,25)   | 1.092    | -DE/DX =   | 0.0   | ! |
| ! R28  | R(23,26)   | 1.0954   | -DE/DX =   | 0.0   | ! |
| ! R29  | R(27,28)   | 1.5424   | -DE/DX =   | 0.0   | ! |
| ! R30  | R(27,32)   | 1.5372   | -DE/DX =   | 0.0   | ! |
| ! R31  | R(27,36)   | 1.5425   | -DE/DX =   | 0.0   | ! |
| ! R32  | R(27,40)   | 1.5173   | -DE/DX =   | 0.0   | ! |
| ! R33  | R(28,29)   | 1.091    | -DE/DX =   | 0.0   | ! |
| ! R34  | R(28,30)   | 1.095    | -DE/DX =   | 0.0   | ! |
| ! R35  | R(28,31)   | 1.0955   | -DE/DX =   | 0.0   | ! |
| ! R36  | R(32,33)   | 1.0954   | -DE/DX =   | 0.0   | ! |
| ! R37  | R(32,34)   | 1.0919   | -DE/DX =   | 0.0   | ! |
| ! R38  | R(32,35)   | 1.0918   | -DE/DX =   | 0.0   | ! |
| ! R39  | R(36,37)   | 1.095    | -DE/DX =   | 0.0   | ! |
| ! R40  | R(36,38)   | 1.0911   | -DE/DX =   | 0.0   | ! |
| ! R41  | R(36,39)   | 1.0955   | -DE/DX =   | 0.0   | ! |
| ! R42  | R(40,42)   | 1.2841   | -DE/DX =   | 0.0   | ! |
| ! R43  | R(41,43)   | 1.2833   | -DE/DX =   | 0.0   | ! |
| ! A1   | A(2,1,6)   | 120.5084 | -DE/DX =   | 0.0   | ! |
| ! A2   | A(2,1,7)   | 116.4001 | -DE/DX =   | 0.0   | ! |
| ! A3   | A(6,1,7)   | 123.0913 | -DE/DX =   | 0.0   | ! |
| ! A4   | A(1,2,3)   | 119.4618 | -DE/DX =   | 0.0   | ! |
| ! A5   | A(1,2,40)  | 116.151  | -DE/DX =   | 0.0   | ! |
| ! A6   | A(3,2,40)  | 124.3867 | -DE/DX =   | 0.0   | ! |
| ! A7   | A(2,3,4)   | 120.1776 | -DE/DX =   | 0.0   | ! |
| ! A8   | A(2,3,8)   | 121.7118 | -DE/DX =   | 0.0   | ! |
| ! A9   | A(4,3,8)   | 118.1105 | -DE/DX =   | 0.0   | ! |
| ! A10  | A(3,4,5)   | 120.0488 | -DE/DX =   | 0.0   | ! |
| ! A11  | A(3,4,10)  | 119.6825 | -DE/DX =   | 0.0   | ! |
| ! A12  | A(5,4,10)  | 120.2604 | -DE/DX =   | 0.0   | ! |
| ! A13  | A(4,5,6)   | 120.466  | -DE/DX =   | 0.0   | ! |
| ! A14  | A(4,5,9)   | 121.0559 | -DE/DX =   | 0.0   | ! |
| ! A15  | A(6,5,9)   | 118.4781 | -DE/DX =   | 0.0   | ! |
| ! A16  | A(1,6,5)   | 119.3366 | -DE/DX =   | 0.0   | ! |
| ! A17  | A(1,6,41)  | 123.5723 | -DE/DX =   | 0.0   | ! |
| ! A18  | A(5,6,41)  | 117.091  | -DE/DX =   | 0.0   | ! |



|       |             |          |          |     |   |
|-------|-------------|----------|----------|-----|---|
| ! A19 | A(4,10,11)  | 111.1515 | -DE/DX = | 0.0 | ! |
| ! A20 | A(4,10,12)  | 111.5226 | -DE/DX = | 0.0 | ! |
| ! A21 | A(4,10,13)  | 111.2896 | -DE/DX = | 0.0 | ! |
| ! A22 | A(11,10,12) | 107.2114 | -DE/DX = | 0.0 | ! |
| ! A23 | A(11,10,13) | 107.4197 | -DE/DX = | 0.0 | ! |
| ! A24 | A(12,10,13) | 108.0446 | -DE/DX = | 0.0 | ! |
| ! A25 | A(15,14,19) | 112.7117 | -DE/DX = | 0.0 | ! |
| ! A26 | A(15,14,23) | 108.2595 | -DE/DX = | 0.0 | ! |
| ! A27 | A(15,14,41) | 110.1333 | -DE/DX = | 0.0 | ! |
| ! A28 | A(19,14,23) | 108.2718 | -DE/DX = | 0.0 | ! |
| ! A29 | A(19,14,41) | 110.0962 | -DE/DX = | 0.0 | ! |
| ! A30 | A(23,14,41) | 107.1794 | -DE/DX = | 0.0 | ! |
| ! A31 | A(14,15,16) | 109.0136 | -DE/DX = | 0.0 | ! |
| ! A32 | A(14,15,17) | 110.0739 | -DE/DX = | 0.0 | ! |
| ! A33 | A(14,15,18) | 113.8163 | -DE/DX = | 0.0 | ! |
| ! A34 | A(16,15,17) | 107.9942 | -DE/DX = | 0.0 | ! |
| ! A35 | A(16,15,18) | 107.6358 | -DE/DX = | 0.0 | ! |
| ! A36 | A(17,15,18) | 108.1283 | -DE/DX = | 0.0 | ! |
| ! A37 | A(14,19,20) | 110.0654 | -DE/DX = | 0.0 | ! |
| ! A38 | A(14,19,21) | 109.0358 | -DE/DX = | 0.0 | ! |
| ! A39 | A(14,19,22) | 113.7949 | -DE/DX = | 0.0 | ! |
| ! A40 | A(20,19,21) | 108.0014 | -DE/DX = | 0.0 | ! |
| ! A41 | A(20,19,22) | 108.1293 | -DE/DX = | 0.0 | ! |
| ! A42 | A(21,19,22) | 107.6368 | -DE/DX = | 0.0 | ! |
| ! A43 | A(14,23,24) | 111.5889 | -DE/DX = | 0.0 | ! |
| ! A44 | A(14,23,25) | 111.5714 | -DE/DX = | 0.0 | ! |
| ! A45 | A(14,23,26) | 108.151  | -DE/DX = | 0.0 | ! |
| ! A46 | A(24,23,25) | 107.9152 | -DE/DX = | 0.0 | ! |
| ! A47 | A(24,23,26) | 108.778  | -DE/DX = | 0.0 | ! |
| ! A48 | A(25,23,26) | 108.7685 | -DE/DX = | 0.0 | ! |
| ! A49 | A(28,27,32) | 108.138  | -DE/DX = | 0.0 | ! |
| ! A50 | A(28,27,36) | 112.8889 | -DE/DX = | 0.0 | ! |
| ! A51 | A(28,27,40) | 110.0898 | -DE/DX = | 0.0 | ! |
| ! A52 | A(32,27,36) | 108.1404 | -DE/DX = | 0.0 | ! |
| ! A53 | A(32,27,40) | 107.3676 | -DE/DX = | 0.0 | ! |
| ! A54 | A(36,27,40) | 110.0269 | -DE/DX = | 0.0 | ! |
| ! A55 | A(27,28,29) | 113.7676 | -DE/DX = | 0.0 | ! |
| ! A56 | A(27,28,30) | 110.0302 | -DE/DX = | 0.0 | ! |
| ! A57 | A(27,28,31) | 109.1743 | -DE/DX = | 0.0 | ! |
| ! A58 | A(29,28,30) | 107.9248 | -DE/DX = | 0.0 | ! |
| ! A59 | A(29,28,31) | 107.7548 | -DE/DX = | 0.0 | ! |
| ! A60 | A(30,28,31) | 108.0147 | -DE/DX = | 0.0 | ! |
| ! A61 | A(27,32,33) | 108.0989 | -DE/DX = | 0.0 | ! |
| ! A62 | A(27,32,34) | 111.5815 | -DE/DX = | 0.0 | ! |
| ! A63 | A(27,32,35) | 111.6002 | -DE/DX = | 0.0 | ! |
| ! A64 | A(33,32,34) | 108.784  | -DE/DX = | 0.0 | ! |
| ! A65 | A(33,32,35) | 108.7895 | -DE/DX = | 0.0 | ! |
| ! A66 | A(34,32,35) | 107.9198 | -DE/DX = | 0.0 | ! |
| ! A67 | A(27,36,37) | 110.0074 | -DE/DX = | 0.0 | ! |
| ! A68 | A(27,36,38) | 113.7542 | -DE/DX = | 0.0 | ! |
| ! A69 | A(27,36,39) | 109.2073 | -DE/DX = | 0.0 | ! |
| ! A70 | A(37,36,38) | 107.9161 | -DE/DX = | 0.0 | ! |
| ! A71 | A(37,36,39) | 108.0223 | -DE/DX = | 0.0 | ! |
| ! A72 | A(38,36,39) | 107.7601 | -DE/DX = | 0.0 | ! |
| ! A73 | A(2,40,27)  | 125.9013 | -DE/DX = | 0.0 | ! |
| ! A74 | A(2,40,42)  | 117.4558 | -DE/DX = | 0.0 | ! |
| ! A75 | A(27,40,42) | 116.6428 | -DE/DX = | 0.0 | ! |
| ! A76 | A(6,41,14)  | 125.9136 | -DE/DX = | 0.0 | ! |
| ! A77 | A(6,41,43)  | 117.2672 | -DE/DX = | 0.0 | ! |
| ! A78 | A(14,41,43) | 116.8192 | -DE/DX = | 0.0 | ! |
| ! D1  | D(6,1,2,3)  | -0.0012  | -DE/DX = | 0.0 | ! |
| ! D2  | D(6,1,2,40) | -179.769 | -DE/DX = | 0.0 | ! |
| ! D3  | D(7,1,2,3)  | 179.8294 | -DE/DX = | 0.0 | ! |
| ! D4  | D(7,1,2,40) | 0.0617   | -DE/DX = | 0.0 | ! |
| ! D5  | D(2,1,6,5)  | -0.0758  | -DE/DX = | 0.0 | ! |

|       |                |           |          |     |   |
|-------|----------------|-----------|----------|-----|---|
| ! D6  | D(2,1,6,41)    | 179.8304  | -DE/DX = | 0.0 | ! |
| ! D7  | D(7,1,6,5)     | -179.8948 | -DE/DX = | 0.0 | ! |
| ! D8  | D(7,1,6,41)    | 0.0114    | -DE/DX = | 0.0 | ! |
| ! D9  | D(1,2,3,4)     | 0.2229    | -DE/DX = | 0.0 | ! |
| ! D10 | D(1,2,3,8)     | -179.659  | -DE/DX = | 0.0 | ! |
| ! D11 | D(40,2,3,4)    | 179.9702  | -DE/DX = | 0.0 | ! |
| ! D12 | D(40,2,3,8)    | 0.0883    | -DE/DX = | 0.0 | ! |
| ! D13 | D(1,2,40,27)   | -179.2618 | -DE/DX = | 0.0 | ! |
| ! D14 | D(1,2,40,42)   | 0.6091    | -DE/DX = | 0.0 | ! |
| ! D15 | D(3,2,40,27)   | 0.9833    | -DE/DX = | 0.0 | ! |
| ! D16 | D(3,2,40,42)   | -179.1458 | -DE/DX = | 0.0 | ! |
| ! D17 | D(2,3,4,5)     | -0.3678   | -DE/DX = | 0.0 | ! |
| ! D18 | D(2,3,4,10)    | 178.5862  | -DE/DX = | 0.0 | ! |
| ! D19 | D(8,3,4,5)     | 179.5183  | -DE/DX = | 0.0 | ! |
| ! D20 | D(8,3,4,10)    | -1.5277   | -DE/DX = | 0.0 | ! |
| ! D21 | D(3,4,5,6)     | 0.2904    | -DE/DX = | 0.0 | ! |
| ! D22 | D(3,4,5,9)     | -179.6559 | -DE/DX = | 0.0 | ! |
| ! D23 | D(10,4,5,6)    | -178.6575 | -DE/DX = | 0.0 | ! |
| ! D24 | D(10,4,5,9)    | 1.3962    | -DE/DX = | 0.0 | ! |
| ! D25 | D(3,4,10,11)   | -80.3422  | -DE/DX = | 0.0 | ! |
| ! D26 | D(3,4,10,12)   | 39.2375   | -DE/DX = | 0.0 | ! |
| ! D27 | D(3,4,10,13)   | 159.9703  | -DE/DX = | 0.0 | ! |
| ! D28 | D(5,4,10,11)   | 98.6095   | -DE/DX = | 0.0 | ! |
| ! D29 | D(5,4,10,12)   | -141.8108 | -DE/DX = | 0.0 | ! |
| ! D30 | D(5,4,10,13)   | -21.0779  | -DE/DX = | 0.0 | ! |
| ! D31 | D(4,5,6,1)     | -0.0689   | -DE/DX = | 0.0 | ! |
| ! D32 | D(4,5,6,41)    | -179.9811 | -DE/DX = | 0.0 | ! |
| ! D33 | D(9,5,6,1)     | 179.8788  | -DE/DX = | 0.0 | ! |
| ! D34 | D(9,5,6,41)    | -0.0334   | -DE/DX = | 0.0 | ! |
| ! D35 | D(1,6,41,14)   | -0.6165   | -DE/DX = | 0.0 | ! |
| ! D36 | D(1,6,41,43)   | 179.4199  | -DE/DX = | 0.0 | ! |
| ! D37 | D(5,6,41,14)   | 179.2917  | -DE/DX = | 0.0 | ! |
| ! D38 | D(5,6,41,43)   | -0.6719   | -DE/DX = | 0.0 | ! |
| ! D39 | D(19,14,15,16) | 61.7935   | -DE/DX = | 0.0 | ! |
| ! D40 | D(19,14,15,17) | -179.9247 | -DE/DX = | 0.0 | ! |
| ! D41 | D(19,14,15,18) | -58.3639  | -DE/DX = | 0.0 | ! |
| ! D42 | D(23,14,15,16) | -57.9418  | -DE/DX = | 0.0 | ! |
| ! D43 | D(23,14,15,17) | 60.34     | -DE/DX = | 0.0 | ! |
| ! D44 | D(23,14,15,18) | -178.0992 | -DE/DX = | 0.0 | ! |
| ! D45 | D(41,14,15,16) | -174.8282 | -DE/DX = | 0.0 | ! |
| ! D46 | D(41,14,15,17) | -56.5464  | -DE/DX = | 0.0 | ! |
| ! D47 | D(41,14,15,18) | 65.0144   | -DE/DX = | 0.0 | ! |
| ! D48 | D(15,14,19,20) | 179.8856  | -DE/DX = | 0.0 | ! |
| ! D49 | D(15,14,19,21) | -61.8156  | -DE/DX = | 0.0 | ! |
| ! D50 | D(15,14,19,22) | 58.3448   | -DE/DX = | 0.0 | ! |
| ! D51 | D(23,14,19,20) | -60.3862  | -DE/DX = | 0.0 | ! |
| ! D52 | D(23,14,19,21) | 57.9126   | -DE/DX = | 0.0 | ! |
| ! D53 | D(23,14,19,22) | 178.073   | -DE/DX = | 0.0 | ! |
| ! D54 | D(41,14,19,20) | 56.4867   | -DE/DX = | 0.0 | ! |
| ! D55 | D(41,14,19,21) | 174.7855  | -DE/DX = | 0.0 | ! |
| ! D56 | D(41,14,19,22) | -65.0541  | -DE/DX = | 0.0 | ! |
| ! D57 | D(15,14,23,24) | -179.246  | -DE/DX = | 0.0 | ! |
| ! D58 | D(15,14,23,25) | -58.4372  | -DE/DX = | 0.0 | ! |
| ! D59 | D(15,14,23,26) | 61.1473   | -DE/DX = | 0.0 | ! |
| ! D60 | D(19,14,23,24) | 58.2683   | -DE/DX = | 0.0 | ! |
| ! D61 | D(19,14,23,25) | 179.0772  | -DE/DX = | 0.0 | ! |
| ! D62 | D(19,14,23,26) | -61.3384  | -DE/DX = | 0.0 | ! |
| ! D63 | D(41,14,23,24) | -60.4702  | -DE/DX = | 0.0 | ! |
| ! D64 | D(41,14,23,25) | 60.3386   | -DE/DX = | 0.0 | ! |
| ! D65 | D(41,14,23,26) | 179.9231  | -DE/DX = | 0.0 | ! |
| ! D66 | D(15,14,41,6)  | -61.9619  | -DE/DX = | 0.0 | ! |
| ! D67 | D(15,14,41,43) | 118.0018  | -DE/DX = | 0.0 | ! |
| ! D68 | D(19,14,41,6)  | 62.9288   | -DE/DX = | 0.0 | ! |
| ! D69 | D(19,14,41,43) | -117.1074 | -DE/DX = | 0.0 | ! |
| ! D70 | D(23,14,41,6)  | -179.5192 | -DE/DX = | 0.0 | ! |

|        |                |           |          |     |   |
|--------|----------------|-----------|----------|-----|---|
| ! D71  | D(23,14,41,43) | 0.4445    | -DE/DX = | 0.0 | ! |
| ! D72  | D(32,27,28,29) | 179.3379  | -DE/DX = | 0.0 | ! |
| ! D73  | D(32,27,28,30) | -59.4311  | -DE/DX = | 0.0 | ! |
| ! D74  | D(32,27,28,31) | 58.9463   | -DE/DX = | 0.0 | ! |
| ! D75  | D(36,27,28,29) | 59.7387   | -DE/DX = | 0.0 | ! |
| ! D76  | D(36,27,28,30) | -179.0304 | -DE/DX = | 0.0 | ! |
| ! D77  | D(36,27,28,31) | -60.6529  | -DE/DX = | 0.0 | ! |
| ! D78  | D(40,27,28,29) | -63.6439  | -DE/DX = | 0.0 | ! |
| ! D79  | D(40,27,28,30) | 57.587    | -DE/DX = | 0.0 | ! |
| ! D80  | D(40,27,28,31) | 175.9644  | -DE/DX = | 0.0 | ! |
| ! D81  | D(28,27,32,33) | -61.176   | -DE/DX = | 0.0 | ! |
| ! D82  | D(28,27,32,34) | 58.4002   | -DE/DX = | 0.0 | ! |
| ! D83  | D(28,27,32,35) | 179.2298  | -DE/DX = | 0.0 | ! |
| ! D84  | D(36,27,32,33) | 61.3727   | -DE/DX = | 0.0 | ! |
| ! D85  | D(36,27,32,34) | -179.0512 | -DE/DX = | 0.0 | ! |
| ! D86  | D(36,27,32,35) | -58.2216  | -DE/DX = | 0.0 | ! |
| ! D87  | D(40,27,32,33) | -179.9381 | -DE/DX = | 0.0 | ! |
| ! D88  | D(40,27,32,34) | -60.3619  | -DE/DX = | 0.0 | ! |
| ! D89  | D(40,27,32,35) | 60.4676   | -DE/DX = | 0.0 | ! |
| ! D90  | D(28,27,36,37) | 179.0137  | -DE/DX = | 0.0 | ! |
| ! D91  | D(28,27,36,38) | -59.7927  | -DE/DX = | 0.0 | ! |
| ! D92  | D(28,27,36,39) | 60.6205   | -DE/DX = | 0.0 | ! |
| ! D93  | D(32,27,36,37) | 59.4159   | -DE/DX = | 0.0 | ! |
| ! D94  | D(32,27,36,38) | -179.3905 | -DE/DX = | 0.0 | ! |
| ! D95  | D(32,27,36,39) | -58.9773  | -DE/DX = | 0.0 | ! |
| ! D96  | D(40,27,36,37) | -57.5689  | -DE/DX = | 0.0 | ! |
| ! D97  | D(40,27,36,38) | 63.6248   | -DE/DX = | 0.0 | ! |
| ! D98  | D(40,27,36,39) | -175.962  | -DE/DX = | 0.0 | ! |
| ! D99  | D(28,27,40,2)  | 61.7512   | -DE/DX = | 0.0 | ! |
| ! D100 | D(28,27,40,42) | -118.1207 | -DE/DX = | 0.0 | ! |
| ! D101 | D(32,27,40,2)  | 179.248   | -DE/DX = | 0.0 | ! |
| ! D102 | D(32,27,40,42) | -0.6239   | -DE/DX = | 0.0 | ! |
| ! D103 | D(36,27,40,2)  | -63.2863  | -DE/DX = | 0.0 | ! |
| ! D104 | D(36,27,40,42) | 116.8418  | -DE/DX = | 0.0 | ! |

-----  
GradGradGradGradGradGradGradGradGradGradGradGradGradGradGradGradGradGradGradGrad

Input orientation:

| Center<br>Number | Atomic<br>Number | Atomic<br>Type | Coordinates (Angstroms) |           |           |
|------------------|------------------|----------------|-------------------------|-----------|-----------|
|                  |                  |                | X                       | Y         | Z         |
| 1                | 6                | 0              | 0.128374                | 0.157637  | -0.020905 |
| 2                | 6                | 0              | 0.067122                | -0.279707 | 1.314933  |
| 3                | 6                | 0              | 1.259655                | -0.539036 | 2.013031  |
| 4                | 6                | 0              | 2.498554                | -0.358180 | 1.382891  |
| 5                | 6                | 0              | 2.551496                | 0.071561  | 0.061111  |
| 6                | 6                | 0              | 1.362980                | 0.334720  | -0.654258 |
| 7                | 1                | 0              | -0.812330               | 0.338349  | -0.508166 |
| 8                | 1                | 0              | 1.254900                | -0.881186 | 3.037285  |
| 9                | 1                | 0              | 3.498439                | 0.211189  | -0.442766 |
| 10               | 6                | 0              | 3.775143                | -0.609653 | 2.154397  |
| 11               | 1                | 0              | 4.027743                | 0.247387  | 2.792587  |
| 12               | 1                | 0              | 3.684312                | -1.484800 | 2.807704  |
| 13               | 1                | 0              | 4.620504                | -0.776353 | 1.480134  |
| 14               | 6                | 0              | 0.362122                | 1.091956  | -2.949712 |
| 15               | 6                | 0              | -0.501601               | -0.163423 | -3.190413 |
| 16               | 1                | 0              | -1.258811               | 0.064336  | -3.948588 |
| 17               | 1                | 0              | 0.120928                | -0.981088 | -3.568941 |
| 18               | 1                | 0              | -1.022061               | -0.517510 | -2.299435 |
| 19               | 6                | 0              | -0.456500               | 2.284154  | -2.412468 |
| 20               | 1                | 0              | 0.197296                | 3.148637  | -2.255640 |
| 21               | 1                | 0              | -1.212685               | 2.561839  | -3.154873 |
| 22               | 1                | 0              | -0.974405               | 2.075746  | -1.475155 |
| 23               | 6                | 0              | 0.994146                | 1.505568  | -4.288319 |

|    |   |   |           |           |           |
|----|---|---|-----------|-----------|-----------|
| 24 | 1 | 0 | 1.630707  | 2.385716  | -4.177116 |
| 25 | 1 | 0 | 1.601965  | 0.702585  | -4.710428 |
| 26 | 1 | 0 | 0.185808  | 1.741279  | -4.988957 |
| 27 | 6 | 0 | -1.555839 | -0.874503 | 3.280308  |
| 28 | 6 | 0 | -0.979435 | 0.135148  | 4.293921  |
| 29 | 1 | 0 | 0.109373  | 0.201618  | 4.277617  |
| 30 | 1 | 0 | -1.381068 | 1.134688  | 4.097400  |
| 31 | 1 | 0 | -1.281097 | -0.158355 | 5.305340  |
| 32 | 6 | 0 | -3.086326 | -0.876119 | 3.424044  |
| 33 | 1 | 0 | -3.332040 | -1.192466 | 4.443606  |
| 34 | 1 | 0 | -3.506832 | 0.116967  | 3.253075  |
| 35 | 1 | 0 | -3.555477 | -1.565467 | 2.719266  |
| 36 | 6 | 0 | -1.050113 | -2.313119 | 3.512753  |
| 37 | 1 | 0 | -1.500661 | -2.991476 | 2.780755  |
| 38 | 1 | 0 | 0.033878  | -2.414758 | 3.441810  |
| 39 | 1 | 0 | -1.352080 | -2.644196 | 4.512449  |
| 40 | 7 | 0 | -1.234354 | -0.433077 | 1.864736  |
| 41 | 7 | 0 | 1.500232  | 0.768764  | -1.997069 |
| 42 | 8 | 0 | -2.233852 | -0.174290 | 1.101268  |
| 43 | 8 | 0 | 2.692390  | 0.901278  | -2.453176 |

### DFT calculations on nitroxide diradical syn-4b at the UB3LYP/6-31G(d) level with Gaussian 03

File: DiNO\_C4dft.log

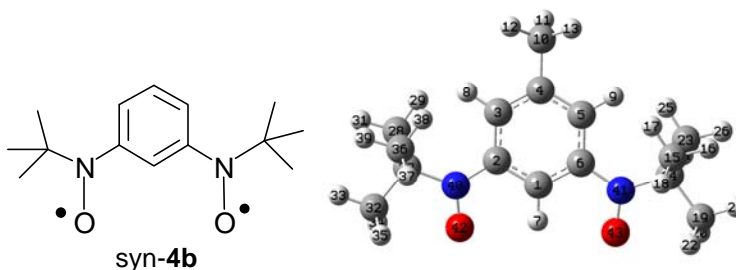

```

*****
Gaussian 03: IA32W-G03RevC.02 12-Jun-2004
                22-Oct-2007
*****
%chk=DiNO_C4dft.chk
%mem=8MW
%nproc=1
Will use up to 1 processors via shared memory.
-----
# opt=tight freq ub3lyp/6-31g(d) geom=connectivity
-----

```

```

SCF Done: E(UB+HF-LYP) = -845.873725530 A.U. after 10 cycles
           Convg = 0.7542D-08 -V/T = 2.0096
           S**2 = 2.0307
Annihilation of the first spin contaminant:
S**2 before annihilation 2.0307, after 2.0005

```

| Item                 | Value    | Threshold | Converged? |
|----------------------|----------|-----------|------------|
| Maximum Force        | 0.000000 | 0.000015  | YES        |
| RMS Force            | 0.000000 | 0.000010  | YES        |
| Maximum Displacement | 0.013707 | 0.000060  | NO         |

RMS Displacement 0.001876 0.000040 NO  
 Predicted change in Energy=-1.466410D-09  
 Optimization completed on the basis of negligible forces.  
 -- Stationary point found.

-----  
 ! Optimized Parameters !  
 ! (Angstroms and Degrees) !  
 -----

| ! Name | Definition | Value    | Derivative Info. | ! |
|--------|------------|----------|------------------|---|
| ! R1   | R(1,2)     | 1.402    | -DE/DX = 0.0     | ! |
| ! R2   | R(1,6)     | 1.402    | -DE/DX = 0.0     | ! |
| ! R3   | R(1,7)     | 1.078    | -DE/DX = 0.0     | ! |
| ! R4   | R(2,3)     | 1.4096   | -DE/DX = 0.0     | ! |
| ! R5   | R(2,40)    | 1.4206   | -DE/DX = 0.0     | ! |
| ! R6   | R(3,4)     | 1.3967   | -DE/DX = 0.0     | ! |
| ! R7   | R(3,8)     | 1.0798   | -DE/DX = 0.0     | ! |
| ! R8   | R(4,5)     | 1.3966   | -DE/DX = 0.0     | ! |
| ! R9   | R(4,10)    | 1.5132   | -DE/DX = 0.0     | ! |
| ! R10  | R(5,6)     | 1.4097   | -DE/DX = 0.0     | ! |
| ! R11  | R(5,9)     | 1.0798   | -DE/DX = 0.0     | ! |
| ! R12  | R(6,41)    | 1.4206   | -DE/DX = 0.0     | ! |
| ! R13  | R(10,11)   | 1.0981   | -DE/DX = 0.0     | ! |
| ! R14  | R(10,12)   | 1.0951   | -DE/DX = 0.0     | ! |
| ! R15  | R(10,13)   | 1.0951   | -DE/DX = 0.0     | ! |
| ! R16  | R(14,15)   | 1.5423   | -DE/DX = 0.0     | ! |
| ! R17  | R(14,19)   | 1.5372   | -DE/DX = 0.0     | ! |
| ! R18  | R(14,23)   | 1.543    | -DE/DX = 0.0     | ! |
| ! R19  | R(14,41)   | 1.5176   | -DE/DX = 0.0     | ! |
| ! R20  | R(15,16)   | 1.0956   | -DE/DX = 0.0     | ! |
| ! R21  | R(15,17)   | 1.0909   | -DE/DX = 0.0     | ! |
| ! R22  | R(15,18)   | 1.095    | -DE/DX = 0.0     | ! |
| ! R23  | R(19,20)   | 1.0914   | -DE/DX = 0.0     | ! |
| ! R24  | R(19,21)   | 1.0955   | -DE/DX = 0.0     | ! |
| ! R25  | R(19,22)   | 1.0921   | -DE/DX = 0.0     | ! |
| ! R26  | R(23,24)   | 1.0949   | -DE/DX = 0.0     | ! |
| ! R27  | R(23,25)   | 1.0913   | -DE/DX = 0.0     | ! |
| ! R28  | R(23,26)   | 1.0956   | -DE/DX = 0.0     | ! |
| ! R29  | R(27,28)   | 1.543    | -DE/DX = 0.0     | ! |
| ! R30  | R(27,32)   | 1.5372   | -DE/DX = 0.0     | ! |
| ! R31  | R(27,36)   | 1.5422   | -DE/DX = 0.0     | ! |
| ! R32  | R(27,40)   | 1.5176   | -DE/DX = 0.0     | ! |
| ! R33  | R(28,29)   | 1.0913   | -DE/DX = 0.0     | ! |
| ! R34  | R(28,30)   | 1.0949   | -DE/DX = 0.0     | ! |
| ! R35  | R(28,31)   | 1.0956   | -DE/DX = 0.0     | ! |
| ! R36  | R(32,33)   | 1.0955   | -DE/DX = 0.0     | ! |
| ! R37  | R(32,34)   | 1.0914   | -DE/DX = 0.0     | ! |
| ! R38  | R(32,35)   | 1.0921   | -DE/DX = 0.0     | ! |
| ! R39  | R(36,37)   | 1.095    | -DE/DX = 0.0     | ! |
| ! R40  | R(36,38)   | 1.0909   | -DE/DX = 0.0     | ! |
| ! R41  | R(36,39)   | 1.0955   | -DE/DX = 0.0     | ! |
| ! R42  | R(40,42)   | 1.2823   | -DE/DX = 0.0     | ! |
| ! R43  | R(41,43)   | 1.2823   | -DE/DX = 0.0     | ! |
| ! A1   | A(2,1,6)   | 120.7063 | -DE/DX = 0.0     | ! |
| ! A2   | A(2,1,7)   | 119.6461 | -DE/DX = 0.0     | ! |
| ! A3   | A(6,1,7)   | 119.6464 | -DE/DX = 0.0     | ! |
| ! A4   | A(1,2,3)   | 119.3258 | -DE/DX = 0.0     | ! |
| ! A5   | A(1,2,40)  | 116.681  | -DE/DX = 0.0     | ! |
| ! A6   | A(3,2,40)  | 123.9926 | -DE/DX = 0.0     | ! |
| ! A7   | A(2,3,4)   | 120.2365 | -DE/DX = 0.0     | ! |
| ! A8   | A(2,3,8)   | 121.6546 | -DE/DX = 0.0     | ! |
| ! A9   | A(4,3,8)   | 118.1052 | -DE/DX = 0.0     | ! |
| ! A10  | A(3,4,5)   | 120.1657 | -DE/DX = 0.0     | ! |
| ! A11  | A(3,4,10)  | 119.9055 | -DE/DX = 0.0     | ! |
| ! A12  | A(5,4,10)  | 119.9076 | -DE/DX = 0.0     | ! |

|       |             |          |          |     |   |
|-------|-------------|----------|----------|-----|---|
| ! A13 | A(4,5,6)    | 120.2384 | -DE/DX = | 0.0 | ! |
| ! A14 | A(4,5,9)    | 118.1012 | -DE/DX = | 0.0 | ! |
| ! A15 | A(6,5,9)    | 121.6568 | -DE/DX = | 0.0 | ! |
| ! A16 | A(1,6,5)    | 119.3228 | -DE/DX = | 0.0 | ! |
| ! A17 | A(1,6,41)   | 116.6804 | -DE/DX = | 0.0 | ! |
| ! A18 | A(5,6,41)   | 123.9964 | -DE/DX = | 0.0 | ! |
| ! A19 | A(4,10,11)  | 111.221  | -DE/DX = | 0.0 | ! |
| ! A20 | A(4,10,12)  | 111.4995 | -DE/DX = | 0.0 | ! |
| ! A21 | A(4,10,13)  | 111.4995 | -DE/DX = | 0.0 | ! |
| ! A22 | A(11,10,12) | 107.2662 | -DE/DX = | 0.0 | ! |
| ! A23 | A(11,10,13) | 107.2677 | -DE/DX = | 0.0 | ! |
| ! A24 | A(12,10,13) | 107.8684 | -DE/DX = | 0.0 | ! |
| ! A25 | A(15,14,19) | 108.0895 | -DE/DX = | 0.0 | ! |
| ! A26 | A(15,14,23) | 112.8586 | -DE/DX = | 0.0 | ! |
| ! A27 | A(15,14,41) | 110.2137 | -DE/DX = | 0.0 | ! |
| ! A28 | A(19,14,23) | 108.205  | -DE/DX = | 0.0 | ! |
| ! A29 | A(19,14,41) | 107.2873 | -DE/DX = | 0.0 | ! |
| ! A30 | A(23,14,41) | 109.9928 | -DE/DX = | 0.0 | ! |
| ! A31 | A(14,15,16) | 109.1436 | -DE/DX = | 0.0 | ! |
| ! A32 | A(14,15,17) | 113.8279 | -DE/DX = | 0.0 | ! |
| ! A33 | A(14,15,18) | 110.0402 | -DE/DX = | 0.0 | ! |
| ! A34 | A(16,15,17) | 107.7503 | -DE/DX = | 0.0 | ! |
| ! A35 | A(16,15,18) | 107.9933 | -DE/DX = | 0.0 | ! |
| ! A36 | A(17,15,18) | 107.9073 | -DE/DX = | 0.0 | ! |
| ! A37 | A(14,19,20) | 111.6082 | -DE/DX = | 0.0 | ! |
| ! A38 | A(14,19,21) | 108.18   | -DE/DX = | 0.0 | ! |
| ! A39 | A(14,19,22) | 111.4333 | -DE/DX = | 0.0 | ! |
| ! A40 | A(20,19,21) | 108.856  | -DE/DX = | 0.0 | ! |
| ! A41 | A(20,19,22) | 107.9141 | -DE/DX = | 0.0 | ! |
| ! A42 | A(21,19,22) | 108.7864 | -DE/DX = | 0.0 | ! |
| ! A43 | A(14,23,24) | 109.9649 | -DE/DX = | 0.0 | ! |
| ! A44 | A(14,23,25) | 113.6868 | -DE/DX = | 0.0 | ! |
| ! A45 | A(14,23,26) | 109.2733 | -DE/DX = | 0.0 | ! |
| ! A46 | A(24,23,25) | 107.943  | -DE/DX = | 0.0 | ! |
| ! A47 | A(24,23,26) | 108.0692 | -DE/DX = | 0.0 | ! |
| ! A48 | A(25,23,26) | 107.7357 | -DE/DX = | 0.0 | ! |
| ! A49 | A(28,27,32) | 108.2076 | -DE/DX = | 0.0 | ! |
| ! A50 | A(28,27,36) | 112.8567 | -DE/DX = | 0.0 | ! |
| ! A51 | A(28,27,40) | 109.9893 | -DE/DX = | 0.0 | ! |
| ! A52 | A(32,27,36) | 108.0894 | -DE/DX = | 0.0 | ! |
| ! A53 | A(32,27,40) | 107.2861 | -DE/DX = | 0.0 | ! |
| ! A54 | A(36,27,40) | 110.2178 | -DE/DX = | 0.0 | ! |
| ! A55 | A(27,28,29) | 113.6835 | -DE/DX = | 0.0 | ! |
| ! A56 | A(27,28,30) | 109.964  | -DE/DX = | 0.0 | ! |
| ! A57 | A(27,28,31) | 109.2757 | -DE/DX = | 0.0 | ! |
| ! A58 | A(29,28,30) | 107.9443 | -DE/DX = | 0.0 | ! |
| ! A59 | A(29,28,31) | 107.7352 | -DE/DX = | 0.0 | ! |
| ! A60 | A(30,28,31) | 108.0705 | -DE/DX = | 0.0 | ! |
| ! A61 | A(27,32,33) | 108.1812 | -DE/DX = | 0.0 | ! |
| ! A62 | A(27,32,34) | 111.6102 | -DE/DX = | 0.0 | ! |
| ! A63 | A(27,32,35) | 111.4315 | -DE/DX = | 0.0 | ! |
| ! A64 | A(33,32,34) | 108.8563 | -DE/DX = | 0.0 | ! |
| ! A65 | A(33,32,35) | 108.7846 | -DE/DX = | 0.0 | ! |
| ! A66 | A(34,32,35) | 107.9142 | -DE/DX = | 0.0 | ! |
| ! A67 | A(27,36,37) | 110.042  | -DE/DX = | 0.0 | ! |
| ! A68 | A(27,36,38) | 113.8286 | -DE/DX = | 0.0 | ! |
| ! A69 | A(27,36,39) | 109.1412 | -DE/DX = | 0.0 | ! |
| ! A70 | A(37,36,38) | 107.9076 | -DE/DX = | 0.0 | ! |
| ! A71 | A(37,36,39) | 107.9926 | -DE/DX = | 0.0 | ! |
| ! A72 | A(38,36,39) | 107.7503 | -DE/DX = | 0.0 | ! |
| ! A73 | A(2,40,27)  | 125.898  | -DE/DX = | 0.0 | ! |
| ! A74 | A(2,40,42)  | 117.4357 | -DE/DX = | 0.0 | ! |
| ! A75 | A(27,40,42) | 116.6608 | -DE/DX = | 0.0 | ! |
| ! A76 | A(6,41,14)  | 125.8993 | -DE/DX = | 0.0 | ! |
| ! A77 | A(6,41,43)  | 117.4364 | -DE/DX = | 0.0 | ! |

|       |                |           |          |     |   |
|-------|----------------|-----------|----------|-----|---|
| ! A78 | A(14,41,43)    | 116.6591  | -DE/DX = | 0.0 | ! |
| ! D1  | D(6,1,2,3)     | 0.5235    | -DE/DX = | 0.0 | ! |
| ! D2  | D(6,1,2,40)    | -179.7436 | -DE/DX = | 0.0 | ! |
| ! D3  | D(7,1,2,3)     | -179.8764 | -DE/DX = | 0.0 | ! |
| ! D4  | D(7,1,2,40)    | -0.1435   | -DE/DX = | 0.0 | ! |
| ! D5  | D(2,1,6,5)     | -0.5207   | -DE/DX = | 0.0 | ! |
| ! D6  | D(2,1,6,41)    | 179.7272  | -DE/DX = | 0.0 | ! |
| ! D7  | D(7,1,6,5)     | 179.8792  | -DE/DX = | 0.0 | ! |
| ! D8  | D(7,1,6,41)    | 0.1271    | -DE/DX = | 0.0 | ! |
| ! D9  | D(1,2,3,4)     | 0.0271    | -DE/DX = | 0.0 | ! |
| ! D10 | D(1,2,3,8)     | 179.3077  | -DE/DX = | 0.0 | ! |
| ! D11 | D(40,2,3,4)    | -179.6851 | -DE/DX = | 0.0 | ! |
| ! D12 | D(40,2,3,8)    | -0.4045   | -DE/DX = | 0.0 | ! |
| ! D13 | D(1,2,40,27)   | 173.2829  | -DE/DX = | 0.0 | ! |
| ! D14 | D(1,2,40,42)   | -5.8328   | -DE/DX = | 0.0 | ! |
| ! D15 | D(3,2,40,27)   | -6.9979   | -DE/DX = | 0.0 | ! |
| ! D16 | D(3,2,40,42)   | 173.8864  | -DE/DX = | 0.0 | ! |
| ! D17 | D(2,3,4,5)     | -0.5763   | -DE/DX = | 0.0 | ! |
| ! D18 | D(2,3,4,10)    | 177.7459  | -DE/DX = | 0.0 | ! |
| ! D19 | D(8,3,4,5)     | -179.8821 | -DE/DX = | 0.0 | ! |
| ! D20 | D(8,3,4,10)    | -1.5599   | -DE/DX = | 0.0 | ! |
| ! D21 | D(3,4,5,6)     | 0.5791    | -DE/DX = | 0.0 | ! |
| ! D22 | D(3,4,5,9)     | 179.9     | -DE/DX = | 0.0 | ! |
| ! D23 | D(10,4,5,6)    | -177.743  | -DE/DX = | 0.0 | ! |
| ! D24 | D(10,4,5,9)    | 1.5779    | -DE/DX = | 0.0 | ! |
| ! D25 | D(3,4,10,11)   | -89.0926  | -DE/DX = | 0.0 | ! |
| ! D26 | D(3,4,10,12)   | 30.588    | -DE/DX = | 0.0 | ! |
| ! D27 | D(3,4,10,13)   | 151.225   | -DE/DX = | 0.0 | ! |
| ! D28 | D(5,4,10,11)   | 89.2339   | -DE/DX = | 0.0 | ! |
| ! D29 | D(5,4,10,12)   | -151.0855 | -DE/DX = | 0.0 | ! |
| ! D30 | D(5,4,10,13)   | -30.4485  | -DE/DX = | 0.0 | ! |
| ! D31 | D(4,5,6,1)     | -0.0327   | -DE/DX = | 0.0 | ! |
| ! D32 | D(4,5,6,41)    | 179.7002  | -DE/DX = | 0.0 | ! |
| ! D33 | D(9,5,6,1)     | -179.3289 | -DE/DX = | 0.0 | ! |
| ! D34 | D(9,5,6,41)    | 0.4039    | -DE/DX = | 0.0 | ! |
| ! D35 | D(1,6,41,14)   | -173.4745 | -DE/DX = | 0.0 | ! |
| ! D36 | D(1,6,41,43)   | 5.6641    | -DE/DX = | 0.0 | ! |
| ! D37 | D(5,6,41,14)   | 6.7862    | -DE/DX = | 0.0 | ! |
| ! D38 | D(5,6,41,43)   | -174.0752 | -DE/DX = | 0.0 | ! |
| ! D39 | D(19,14,15,16) | 59.4514   | -DE/DX = | 0.0 | ! |
| ! D40 | D(19,14,15,17) | 179.8552  | -DE/DX = | 0.0 | ! |
| ! D41 | D(19,14,15,18) | -58.8873  | -DE/DX = | 0.0 | ! |
| ! D42 | D(23,14,15,16) | -60.1772  | -DE/DX = | 0.0 | ! |
| ! D43 | D(23,14,15,17) | 60.2266   | -DE/DX = | 0.0 | ! |
| ! D44 | D(23,14,15,18) | -178.5159 | -DE/DX = | 0.0 | ! |
| ! D45 | D(41,14,15,16) | 176.4136  | -DE/DX = | 0.0 | ! |
| ! D46 | D(41,14,15,17) | -63.1825  | -DE/DX = | 0.0 | ! |
| ! D47 | D(41,14,15,18) | 58.0749   | -DE/DX = | 0.0 | ! |
| ! D48 | D(15,14,19,20) | 179.9495  | -DE/DX = | 0.0 | ! |
| ! D49 | D(15,14,19,21) | -60.3174  | -DE/DX = | 0.0 | ! |
| ! D50 | D(15,14,19,22) | 59.2248   | -DE/DX = | 0.0 | ! |
| ! D51 | D(23,14,19,20) | -57.5289  | -DE/DX = | 0.0 | ! |
| ! D52 | D(23,14,19,21) | 62.2042   | -DE/DX = | 0.0 | ! |
| ! D53 | D(23,14,19,22) | -178.2537 | -DE/DX = | 0.0 | ! |
| ! D54 | D(41,14,19,20) | 61.1108   | -DE/DX = | 0.0 | ! |
| ! D55 | D(41,14,19,21) | -179.156  | -DE/DX = | 0.0 | ! |
| ! D56 | D(41,14,19,22) | -59.6139  | -DE/DX = | 0.0 | ! |
| ! D57 | D(15,14,23,24) | 179.7525  | -DE/DX = | 0.0 | ! |
| ! D58 | D(15,14,23,25) | -59.0968  | -DE/DX = | 0.0 | ! |
| ! D59 | D(15,14,23,26) | 61.2877   | -DE/DX = | 0.0 | ! |
| ! D60 | D(19,14,23,24) | 60.1906   | -DE/DX = | 0.0 | ! |
| ! D61 | D(19,14,23,25) | -178.6588 | -DE/DX = | 0.0 | ! |
| ! D62 | D(19,14,23,26) | -58.2742  | -DE/DX = | 0.0 | ! |
| ! D63 | D(41,14,23,24) | -56.7161  | -DE/DX = | 0.0 | ! |
| ! D64 | D(41,14,23,25) | 64.4346   | -DE/DX = | 0.0 | ! |

|        |                |           |          |     |   |
|--------|----------------|-----------|----------|-----|---|
| ! D65  | D(41,14,23,26) | -175.1809 | -DE/DX = | 0.0 | ! |
| ! D66  | D(15,14,41,6)  | 57.5048   | -DE/DX = | 0.0 | ! |
| ! D67  | D(15,14,41,43) | -121.6398 | -DE/DX = | 0.0 | ! |
| ! D68  | D(19,14,41,6)  | 174.9646  | -DE/DX = | 0.0 | ! |
| ! D69  | D(19,14,41,43) | -4.18     | -DE/DX = | 0.0 | ! |
| ! D70  | D(23,14,41,6)  | -67.5571  | -DE/DX = | 0.0 | ! |
| ! D71  | D(23,14,41,43) | 113.2984  | -DE/DX = | 0.0 | ! |
| ! D72  | D(32,27,28,29) | 178.6336  | -DE/DX = | 0.0 | ! |
| ! D73  | D(32,27,28,30) | -60.2171  | -DE/DX = | 0.0 | ! |
| ! D74  | D(32,27,28,31) | 58.2502   | -DE/DX = | 0.0 | ! |
| ! D75  | D(36,27,28,29) | 59.0711   | -DE/DX = | 0.0 | ! |
| ! D76  | D(36,27,28,30) | -179.7796 | -DE/DX = | 0.0 | ! |
| ! D77  | D(36,27,28,31) | -61.3123  | -DE/DX = | 0.0 | ! |
| ! D78  | D(40,27,28,29) | -64.4617  | -DE/DX = | 0.0 | ! |
| ! D79  | D(40,27,28,30) | 56.6876   | -DE/DX = | 0.0 | ! |
| ! D80  | D(40,27,28,31) | 175.1549  | -DE/DX = | 0.0 | ! |
| ! D81  | D(28,27,32,33) | -62.227   | -DE/DX = | 0.0 | ! |
| ! D82  | D(28,27,32,34) | 57.5085   | -DE/DX = | 0.0 | ! |
| ! D83  | D(28,27,32,35) | 178.2335  | -DE/DX = | 0.0 | ! |
| ! D84  | D(36,27,32,33) | 60.2939   | -DE/DX = | 0.0 | ! |
| ! D85  | D(36,27,32,34) | -179.9706 | -DE/DX = | 0.0 | ! |
| ! D86  | D(36,27,32,35) | -59.2457  | -DE/DX = | 0.0 | ! |
| ! D87  | D(40,27,32,33) | 179.1367  | -DE/DX = | 0.0 | ! |
| ! D88  | D(40,27,32,34) | -61.1278  | -DE/DX = | 0.0 | ! |
| ! D89  | D(40,27,32,35) | 59.5972   | -DE/DX = | 0.0 | ! |
| ! D90  | D(28,27,36,37) | 178.5234  | -DE/DX = | 0.0 | ! |
| ! D91  | D(28,27,36,38) | -60.2168  | -DE/DX = | 0.0 | ! |
| ! D92  | D(28,27,36,39) | 60.1858   | -DE/DX = | 0.0 | ! |
| ! D93  | D(32,27,36,37) | 58.8928   | -DE/DX = | 0.0 | ! |
| ! D94  | D(32,27,36,38) | -179.8475 | -DE/DX = | 0.0 | ! |
| ! D95  | D(32,27,36,39) | -59.4449  | -DE/DX = | 0.0 | ! |
| ! D96  | D(40,27,36,37) | -58.0703  | -DE/DX = | 0.0 | ! |
| ! D97  | D(40,27,36,38) | 63.1895   | -DE/DX = | 0.0 | ! |
| ! D98  | D(40,27,36,39) | -176.4079 | -DE/DX = | 0.0 | ! |
| ! D99  | D(28,27,40,2)  | 67.7111   | -DE/DX = | 0.0 | ! |
| ! D100 | D(28,27,40,42) | -113.1671 | -DE/DX = | 0.0 | ! |
| ! D101 | D(32,27,40,2)  | -174.8101 | -DE/DX = | 0.0 | ! |
| ! D102 | D(32,27,40,42) | 4.3117    | -DE/DX = | 0.0 | ! |
| ! D103 | D(36,27,40,2)  | -57.3488  | -DE/DX = | 0.0 | ! |
| ! D104 | D(36,27,40,42) | 121.7729  | -DE/DX = | 0.0 | ! |

-----  
GradGradGradGradGradGradGradGradGradGradGradGradGradGradGradGradGradGradGradGrad

Input orientation:

| Center Number | Atomic Number | Atomic Type | Coordinates (Angstroms) |           |           |
|---------------|---------------|-------------|-------------------------|-----------|-----------|
|               |               |             | X                       | Y         | Z         |
| 1             | 6             | 0           | -0.087431               | -0.663471 | -0.029287 |
| 2             | 6             | 0           | -0.092106               | -0.626378 | 1.372197  |
| 3             | 6             | 0           | 1.134579                | -0.607916 | 2.066454  |
| 4             | 6             | 0           | 2.341100                | -0.625874 | 1.363155  |
| 5             | 6             | 0           | 2.339160                | -0.674392 | -0.032645 |
| 6             | 6             | 0           | 1.120324                | -0.693229 | -0.740633 |
| 7             | 1             | 0           | -1.022556               | -0.675708 | -0.565508 |
| 8             | 1             | 0           | 1.174889                | -0.568263 | 3.144768  |
| 9             | 1             | 0           | 3.290928                | -0.685333 | -0.542507 |
| 10            | 6             | 0           | 3.653072                | -0.554306 | 2.113801  |
| 11            | 1             | 0           | 3.969020                | 0.486621  | 2.263609  |
| 12            | 1             | 0           | 3.574750                | -1.015912 | 3.103809  |
| 13            | 1             | 0           | 4.455598                | -1.062369 | 1.568694  |
| 14            | 6             | 0           | 2.183418                | -0.912813 | -3.122094 |
| 15            | 6             | 0           | 2.937333                | -2.222733 | -2.815034 |
| 16            | 1             | 0           | 3.728198                | -2.365104 | -3.559678 |
| 17            | 1             | 0           | 3.402078                | -2.242829 | -1.828297 |



|    |   |   |           |           |           |
|----|---|---|-----------|-----------|-----------|
| 18 | 1 | 0 | 2.252363  | -3.074467 | -2.882008 |
| 19 | 6 | 0 | 1.588129  | -1.024652 | -4.534911 |
| 20 | 1 | 0 | 1.038263  | -0.123457 | -4.811870 |
| 21 | 1 | 0 | 2.411982  | -1.168247 | -5.242561 |
| 22 | 1 | 0 | 0.904702  | -1.872778 | -4.614008 |
| 23 | 6 | 0 | 3.098347  | 0.329016  | -3.081404 |
| 24 | 1 | 0 | 2.517707  | 1.228824  | -3.309673 |
| 25 | 1 | 0 | 3.588944  | 0.480766  | -2.118462 |
| 26 | 1 | 0 | 3.880343  | 0.227148  | -3.842014 |
| 27 | 6 | 0 | -1.616072 | -0.706985 | 3.498378  |
| 28 | 6 | 0 | -1.086307 | 0.554699  | 4.211397  |
| 29 | 1 | 0 | -0.003711 | 0.674611  | 4.143515  |
| 30 | 1 | 0 | -1.552187 | 1.448849  | 3.784369  |
| 31 | 1 | 0 | -1.350967 | 0.507898  | 5.273558  |
| 32 | 6 | 0 | -3.138582 | -0.769550 | 3.700872  |
| 33 | 1 | 0 | -3.337201 | -0.860037 | 4.774411  |
| 34 | 1 | 0 | -3.631268 | 0.129089  | 3.325504  |
| 35 | 1 | 0 | -3.574198 | -1.630230 | 3.188870  |
| 36 | 6 | 0 | -1.005228 | -2.009781 | 4.053442  |
| 37 | 1 | 0 | -1.431143 | -2.874860 | 3.534444  |
| 38 | 1 | 0 | 0.080255  | -2.062857 | 3.958842  |
| 39 | 1 | 0 | -1.252496 | -2.097798 | 5.117087  |
| 40 | 7 | 0 | -1.363572 | -0.603788 | 2.005478  |
| 41 | 7 | 0 | 1.025267  | -0.735869 | -2.157435 |
| 42 | 8 | 0 | -2.396846 | -0.503252 | 1.252750  |
| 43 | 8 | 0 | -0.143490 | -0.631510 | -2.674603 |

---

### DFT calculations on nitroxide diradical 4a at the UB3LYP/6-31G(d) level with Gaussian 03

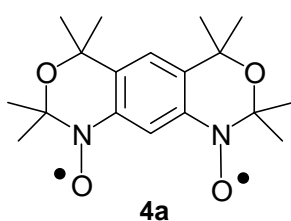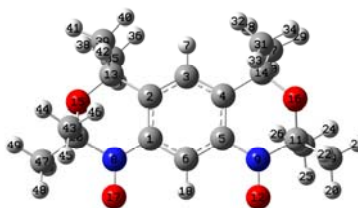

```

*****
Gaussian 03:  IA32W-G03RevC.02 12-Jun-2004
                28-Sep-2007
*****
%chk=C:\G03W\Radicals\Oxazene NO\Freq_Oxaxene_MTDiNO_B3LYP_S1r1.chk
%mem=6MW
%nproc=1
Will use up to    1 processors via shared memory.
-----
# opt freq ub3lyp/6-31g(d) geom=connectivity
-----

SCF Done:  E(UB+HF-LYP) = -1111.85524353      A.U. after   18 cycles
              Convg  =   0.9640D-08          -V/T =   2.0093
              S**2   =   2.0340

Annihilation of the first spin contaminant:
S**2 before annihilation    2.0340,   after    2.0006

```

```

Item          Value      Threshold  Converged?
Maximum Force 0.000006   0.000450   YES
RMS Force     0.000002   0.000300   YES
Maximum Displacement 0.000554   0.001800   YES
RMS Displacement 0.000103   0.001200   YES
Predicted change in Energy=-4.120980D-09
Optimization completed.
  -- Stationary point found.

```

```

-----
!   Optimized Parameters   !
! (Angstroms and Degrees) !
-----

```

| ! Name | Definition | Value  | Derivative | Info. | ! |
|--------|------------|--------|------------|-------|---|
| ! R1   | R(1,2)     | 1.4141 | -DE/DX =   | 0.0   | ! |
| ! R2   | R(1,6)     | 1.3979 | -DE/DX =   | 0.0   | ! |
| ! R3   | R(1,8)     | 1.3998 | -DE/DX =   | 0.0   | ! |
| ! R4   | R(2,3)     | 1.3968 | -DE/DX =   | 0.0   | ! |
| ! R5   | R(2,13)    | 1.522  | -DE/DX =   | 0.0   | ! |
| ! R6   | R(3,4)     | 1.3968 | -DE/DX =   | 0.0   | ! |
| ! R7   | R(3,7)     | 1.0862 | -DE/DX =   | 0.0   | ! |
| ! R8   | R(4,5)     | 1.4141 | -DE/DX =   | 0.0   | ! |
| ! R9   | R(4,14)    | 1.522  | -DE/DX =   | 0.0   | ! |
| ! R10  | R(5,6)     | 1.3979 | -DE/DX =   | 0.0   | ! |
| ! R11  | R(5,9)     | 1.3998 | -DE/DX =   | 0.0   | ! |
| ! R12  | R(6,18)    | 1.0806 | -DE/DX =   | 0.0   | ! |
| ! R13  | R(8,10)    | 1.4964 | -DE/DX =   | 0.0   | ! |
| ! R14  | R(8,17)    | 1.279  | -DE/DX =   | 0.0   | ! |
| ! R15  | R(9,11)    | 1.4964 | -DE/DX =   | 0.0   | ! |
| ! R16  | R(9,12)    | 1.279  | -DE/DX =   | 0.0   | ! |
| ! R17  | R(10,15)   | 1.4146 | -DE/DX =   | 0.0   | ! |
| ! R18  | R(10,43)   | 1.5373 | -DE/DX =   | 0.0   | ! |
| ! R19  | R(10,47)   | 1.5264 | -DE/DX =   | 0.0   | ! |
| ! R20  | R(11,16)   | 1.4146 | -DE/DX =   | 0.0   | ! |
| ! R21  | R(11,19)   | 1.5264 | -DE/DX =   | 0.0   | ! |
| ! R22  | R(11,23)   | 1.5373 | -DE/DX =   | 0.0   | ! |
| ! R23  | R(13,15)   | 1.4453 | -DE/DX =   | 0.0   | ! |
| ! R24  | R(13,35)   | 1.5401 | -DE/DX =   | 0.0   | ! |
| ! R25  | R(13,39)   | 1.5415 | -DE/DX =   | 0.0   | ! |
| ! R26  | R(14,16)   | 1.4453 | -DE/DX =   | 0.0   | ! |
| ! R27  | R(14,27)   | 1.5415 | -DE/DX =   | 0.0   | ! |
| ! R28  | R(14,31)   | 1.5401 | -DE/DX =   | 0.0   | ! |
| ! R29  | R(19,20)   | 1.0902 | -DE/DX =   | 0.0   | ! |
| ! R30  | R(19,21)   | 1.0936 | -DE/DX =   | 0.0   | ! |
| ! R31  | R(19,22)   | 1.0929 | -DE/DX =   | 0.0   | ! |
| ! R32  | R(23,24)   | 1.0941 | -DE/DX =   | 0.0   | ! |
| ! R33  | R(23,25)   | 1.094  | -DE/DX =   | 0.0   | ! |
| ! R34  | R(23,26)   | 1.0931 | -DE/DX =   | 0.0   | ! |
| ! R35  | R(27,28)   | 1.0953 | -DE/DX =   | 0.0   | ! |
| ! R36  | R(27,29)   | 1.0948 | -DE/DX =   | 0.0   | ! |
| ! R37  | R(27,30)   | 1.0922 | -DE/DX =   | 0.0   | ! |
| ! R38  | R(31,32)   | 1.0943 | -DE/DX =   | 0.0   | ! |
| ! R39  | R(31,33)   | 1.0934 | -DE/DX =   | 0.0   | ! |
| ! R40  | R(31,34)   | 1.0949 | -DE/DX =   | 0.0   | ! |
| ! R41  | R(35,36)   | 1.0943 | -DE/DX =   | 0.0   | ! |
| ! R42  | R(35,37)   | 1.0934 | -DE/DX =   | 0.0   | ! |
| ! R43  | R(35,38)   | 1.0949 | -DE/DX =   | 0.0   | ! |
| ! R44  | R(39,40)   | 1.0953 | -DE/DX =   | 0.0   | ! |
| ! R45  | R(39,41)   | 1.0948 | -DE/DX =   | 0.0   | ! |
| ! R46  | R(39,42)   | 1.0922 | -DE/DX =   | 0.0   | ! |
| ! R47  | R(43,44)   | 1.0941 | -DE/DX =   | 0.0   | ! |
| ! R48  | R(43,45)   | 1.0939 | -DE/DX =   | 0.0   | ! |
| ! R49  | R(43,46)   | 1.0931 | -DE/DX =   | 0.0   | ! |
| ! R50  | R(47,48)   | 1.0902 | -DE/DX =   | 0.0   | ! |
| ! R51  | R(47,49)   | 1.0936 | -DE/DX =   | 0.0   | ! |

|       |             |          |          |     |   |
|-------|-------------|----------|----------|-----|---|
| ! R52 | R(47,50)    | 1.0929   | -DE/DX = | 0.0 | ! |
| ! A1  | A(2,1,6)    | 121.0099 | -DE/DX = | 0.0 | ! |
| ! A2  | A(2,1,8)    | 119.972  | -DE/DX = | 0.0 | ! |
| ! A3  | A(6,1,8)    | 119.0139 | -DE/DX = | 0.0 | ! |
| ! A4  | A(1,2,3)    | 117.5756 | -DE/DX = | 0.0 | ! |
| ! A5  | A(1,2,13)   | 121.1151 | -DE/DX = | 0.0 | ! |
| ! A6  | A(3,2,13)   | 121.2589 | -DE/DX = | 0.0 | ! |
| ! A7  | A(2,3,4)    | 123.1597 | -DE/DX = | 0.0 | ! |
| ! A8  | A(2,3,7)    | 118.4202 | -DE/DX = | 0.0 | ! |
| ! A9  | A(4,3,7)    | 118.4201 | -DE/DX = | 0.0 | ! |
| ! A10 | A(3,4,5)    | 117.5756 | -DE/DX = | 0.0 | ! |
| ! A11 | A(3,4,14)   | 121.2588 | -DE/DX = | 0.0 | ! |
| ! A12 | A(5,4,14)   | 121.1152 | -DE/DX = | 0.0 | ! |
| ! A13 | A(4,5,6)    | 121.0098 | -DE/DX = | 0.0 | ! |
| ! A14 | A(4,5,9)    | 119.9722 | -DE/DX = | 0.0 | ! |
| ! A15 | A(6,5,9)    | 119.0137 | -DE/DX = | 0.0 | ! |
| ! A16 | A(1,6,5)    | 119.5876 | -DE/DX = | 0.0 | ! |
| ! A17 | A(1,6,18)   | 120.2062 | -DE/DX = | 0.0 | ! |
| ! A18 | A(5,6,18)   | 120.2062 | -DE/DX = | 0.0 | ! |
| ! A19 | A(1,8,10)   | 119.1342 | -DE/DX = | 0.0 | ! |
| ! A20 | A(1,8,17)   | 121.1201 | -DE/DX = | 0.0 | ! |
| ! A21 | A(10,8,17)  | 118.2972 | -DE/DX = | 0.0 | ! |
| ! A22 | A(5,9,11)   | 119.1343 | -DE/DX = | 0.0 | ! |
| ! A23 | A(5,9,12)   | 121.1201 | -DE/DX = | 0.0 | ! |
| ! A24 | A(11,9,12)  | 118.2972 | -DE/DX = | 0.0 | ! |
| ! A25 | A(8,10,15)  | 109.1165 | -DE/DX = | 0.0 | ! |
| ! A26 | A(8,10,43)  | 107.8879 | -DE/DX = | 0.0 | ! |
| ! A27 | A(8,10,47)  | 108.9441 | -DE/DX = | 0.0 | ! |
| ! A28 | A(15,10,43) | 114.1742 | -DE/DX = | 0.0 | ! |
| ! A29 | A(15,10,47) | 105.117  | -DE/DX = | 0.0 | ! |
| ! A30 | A(43,10,47) | 111.4908 | -DE/DX = | 0.0 | ! |
| ! A31 | A(9,11,16)  | 109.1165 | -DE/DX = | 0.0 | ! |
| ! A32 | A(9,11,19)  | 108.9437 | -DE/DX = | 0.0 | ! |
| ! A33 | A(9,11,23)  | 107.8876 | -DE/DX = | 0.0 | ! |
| ! A34 | A(16,11,19) | 105.1164 | -DE/DX = | 0.0 | ! |
| ! A35 | A(16,11,23) | 114.1759 | -DE/DX = | 0.0 | ! |
| ! A36 | A(19,11,23) | 111.4901 | -DE/DX = | 0.0 | ! |
| ! A37 | A(2,13,15)  | 111.0969 | -DE/DX = | 0.0 | ! |
| ! A38 | A(2,13,35)  | 110.1798 | -DE/DX = | 0.0 | ! |
| ! A39 | A(2,13,39)  | 112.6354 | -DE/DX = | 0.0 | ! |
| ! A40 | A(15,13,35) | 102.8563 | -DE/DX = | 0.0 | ! |
| ! A41 | A(15,13,39) | 110.0406 | -DE/DX = | 0.0 | ! |
| ! A42 | A(35,13,39) | 109.5908 | -DE/DX = | 0.0 | ! |
| ! A43 | A(4,14,16)  | 111.0968 | -DE/DX = | 0.0 | ! |
| ! A44 | A(4,14,27)  | 112.6359 | -DE/DX = | 0.0 | ! |
| ! A45 | A(4,14,31)  | 110.1793 | -DE/DX = | 0.0 | ! |
| ! A46 | A(16,14,27) | 110.042  | -DE/DX = | 0.0 | ! |
| ! A47 | A(16,14,31) | 102.8556 | -DE/DX = | 0.0 | ! |
| ! A48 | A(27,14,31) | 109.5899 | -DE/DX = | 0.0 | ! |
| ! A49 | A(10,15,13) | 122.118  | -DE/DX = | 0.0 | ! |
| ! A50 | A(11,16,14) | 122.1193 | -DE/DX = | 0.0 | ! |
| ! A51 | A(11,19,20) | 110.6554 | -DE/DX = | 0.0 | ! |
| ! A52 | A(11,19,21) | 108.7195 | -DE/DX = | 0.0 | ! |
| ! A53 | A(11,19,22) | 109.7515 | -DE/DX = | 0.0 | ! |
| ! A54 | A(20,19,21) | 109.7477 | -DE/DX = | 0.0 | ! |
| ! A55 | A(20,19,22) | 109.1404 | -DE/DX = | 0.0 | ! |
| ! A56 | A(21,19,22) | 108.7988 | -DE/DX = | 0.0 | ! |
| ! A57 | A(11,23,24) | 109.7843 | -DE/DX = | 0.0 | ! |
| ! A58 | A(11,23,25) | 109.2112 | -DE/DX = | 0.0 | ! |
| ! A59 | A(11,23,26) | 111.7446 | -DE/DX = | 0.0 | ! |
| ! A60 | A(24,23,25) | 109.1508 | -DE/DX = | 0.0 | ! |
| ! A61 | A(24,23,26) | 108.9729 | -DE/DX = | 0.0 | ! |
| ! A62 | A(25,23,26) | 107.9255 | -DE/DX = | 0.0 | ! |
| ! A63 | A(14,27,28) | 110.7529 | -DE/DX = | 0.0 | ! |
| ! A64 | A(14,27,29) | 109.2049 | -DE/DX = | 0.0 | ! |

|       |              |           |          |     |   |
|-------|--------------|-----------|----------|-----|---|
| ! A65 | A(14,27,30)  | 112.1626  | -DE/DX = | 0.0 | ! |
| ! A66 | A(28,27,29)  | 108.2375  | -DE/DX = | 0.0 | ! |
| ! A67 | A(28,27,30)  | 107.7919  | -DE/DX = | 0.0 | ! |
| ! A68 | A(29,27,30)  | 108.5873  | -DE/DX = | 0.0 | ! |
| ! A69 | A(14,31,32)  | 111.1818  | -DE/DX = | 0.0 | ! |
| ! A70 | A(14,31,33)  | 110.1439  | -DE/DX = | 0.0 | ! |
| ! A71 | A(14,31,34)  | 109.4655  | -DE/DX = | 0.0 | ! |
| ! A72 | A(32,31,33)  | 108.769   | -DE/DX = | 0.0 | ! |
| ! A73 | A(32,31,34)  | 108.6414  | -DE/DX = | 0.0 | ! |
| ! A74 | A(33,31,34)  | 108.5842  | -DE/DX = | 0.0 | ! |
| ! A75 | A(13,35,36)  | 111.1818  | -DE/DX = | 0.0 | ! |
| ! A76 | A(13,35,37)  | 110.144   | -DE/DX = | 0.0 | ! |
| ! A77 | A(13,35,38)  | 109.4655  | -DE/DX = | 0.0 | ! |
| ! A78 | A(36,35,37)  | 108.7689  | -DE/DX = | 0.0 | ! |
| ! A79 | A(36,35,38)  | 108.6414  | -DE/DX = | 0.0 | ! |
| ! A80 | A(37,35,38)  | 108.5842  | -DE/DX = | 0.0 | ! |
| ! A81 | A(13,39,40)  | 110.7529  | -DE/DX = | 0.0 | ! |
| ! A82 | A(13,39,41)  | 109.205   | -DE/DX = | 0.0 | ! |
| ! A83 | A(13,39,42)  | 112.1621  | -DE/DX = | 0.0 | ! |
| ! A84 | A(40,39,41)  | 108.2376  | -DE/DX = | 0.0 | ! |
| ! A85 | A(40,39,42)  | 107.7921  | -DE/DX = | 0.0 | ! |
| ! A86 | A(41,39,42)  | 108.5873  | -DE/DX = | 0.0 | ! |
| ! A87 | A(10,43,44)  | 109.7842  | -DE/DX = | 0.0 | ! |
| ! A88 | A(10,43,45)  | 109.2114  | -DE/DX = | 0.0 | ! |
| ! A89 | A(10,43,46)  | 111.7444  | -DE/DX = | 0.0 | ! |
| ! A90 | A(44,43,45)  | 109.1509  | -DE/DX = | 0.0 | ! |
| ! A91 | A(44,43,46)  | 108.9727  | -DE/DX = | 0.0 | ! |
| ! A92 | A(45,43,46)  | 107.9257  | -DE/DX = | 0.0 | ! |
| ! A93 | A(10,47,48)  | 110.6554  | -DE/DX = | 0.0 | ! |
| ! A94 | A(10,47,49)  | 108.7195  | -DE/DX = | 0.0 | ! |
| ! A95 | A(10,47,50)  | 109.7515  | -DE/DX = | 0.0 | ! |
| ! A96 | A(48,47,49)  | 109.7477  | -DE/DX = | 0.0 | ! |
| ! A97 | A(48,47,50)  | 109.1404  | -DE/DX = | 0.0 | ! |
| ! A98 | A(49,47,50)  | 108.7987  | -DE/DX = | 0.0 | ! |
| ! D1  | D(6,1,2,3)   | -2.6644   | -DE/DX = | 0.0 | ! |
| ! D2  | D(6,1,2,13)  | 174.7841  | -DE/DX = | 0.0 | ! |
| ! D3  | D(8,1,2,3)   | 176.5777  | -DE/DX = | 0.0 | ! |
| ! D4  | D(8,1,2,13)  | -5.9738   | -DE/DX = | 0.0 | ! |
| ! D5  | D(2,1,6,5)   | 1.3716    | -DE/DX = | 0.0 | ! |
| ! D6  | D(2,1,6,18)  | -178.6286 | -DE/DX = | 0.0 | ! |
| ! D7  | D(8,1,6,5)   | -177.8777 | -DE/DX = | 0.0 | ! |
| ! D8  | D(8,1,6,18)  | 2.1222    | -DE/DX = | 0.0 | ! |
| ! D9  | D(2,1,8,10)  | -13.2867  | -DE/DX = | 0.0 | ! |
| ! D10 | D(2,1,8,17)  | -179.3204 | -DE/DX = | 0.0 | ! |
| ! D11 | D(6,1,8,10)  | 165.9705  | -DE/DX = | 0.0 | ! |
| ! D12 | D(6,1,8,17)  | -0.0632   | -DE/DX = | 0.0 | ! |
| ! D13 | D(1,2,3,4)   | 1.3048    | -DE/DX = | 0.0 | ! |
| ! D14 | D(1,2,3,7)   | -178.6954 | -DE/DX = | 0.0 | ! |
| ! D15 | D(13,2,3,4)  | -176.1398 | -DE/DX = | 0.0 | ! |
| ! D16 | D(13,2,3,7)  | 3.8601    | -DE/DX = | 0.0 | ! |
| ! D17 | D(1,2,13,15) | -2.185    | -DE/DX = | 0.0 | ! |
| ! D18 | D(1,2,13,35) | -115.5061 | -DE/DX = | 0.0 | ! |
| ! D19 | D(1,2,13,39) | 121.7902  | -DE/DX = | 0.0 | ! |
| ! D20 | D(3,2,13,15) | 175.1691  | -DE/DX = | 0.0 | ! |
| ! D21 | D(3,2,13,35) | 61.8481   | -DE/DX = | 0.0 | ! |
| ! D22 | D(3,2,13,39) | -60.8557  | -DE/DX = | 0.0 | ! |
| ! D23 | D(2,3,4,5)   | 1.3039    | -DE/DX = | 0.0 | ! |
| ! D24 | D(2,3,4,14)  | -176.1397 | -DE/DX = | 0.0 | ! |
| ! D25 | D(7,3,4,5)   | -178.6959 | -DE/DX = | 0.0 | ! |
| ! D26 | D(7,3,4,14)  | 3.8605    | -DE/DX = | 0.0 | ! |
| ! D27 | D(3,4,5,6)   | -2.6641   | -DE/DX = | 0.0 | ! |
| ! D28 | D(3,4,5,9)   | 176.5793  | -DE/DX = | 0.0 | ! |
| ! D29 | D(14,4,5,6)  | 174.7834  | -DE/DX = | 0.0 | ! |
| ! D30 | D(14,4,5,9)  | -5.9732   | -DE/DX = | 0.0 | ! |
| ! D31 | D(3,4,14,16) | 175.1696  | -DE/DX = | 0.0 | ! |

|       |                |           |          |     |   |
|-------|----------------|-----------|----------|-----|---|
| ! D32 | D(3,4,14,27)   | -60.853   | -DE/DX = | 0.0 | ! |
| ! D33 | D(3,4,14,31)   | 61.8496   | -DE/DX = | 0.0 | ! |
| ! D34 | D(5,4,14,16)   | -2.1836   | -DE/DX = | 0.0 | ! |
| ! D35 | D(5,4,14,27)   | 121.7938  | -DE/DX = | 0.0 | ! |
| ! D36 | D(5,4,14,31)   | -115.5035 | -DE/DX = | 0.0 | ! |
| ! D37 | D(4,5,6,1)     | 1.3719    | -DE/DX = | 0.0 | ! |
| ! D38 | D(4,5,6,18)    | -178.6279 | -DE/DX = | 0.0 | ! |
| ! D39 | D(9,5,6,1)     | -177.8786 | -DE/DX = | 0.0 | ! |
| ! D40 | D(9,5,6,18)    | 2.1215    | -DE/DX = | 0.0 | ! |
| ! D41 | D(4,5,9,11)    | -13.288   | -DE/DX = | 0.0 | ! |
| ! D42 | D(4,5,9,12)    | -179.3217 | -DE/DX = | 0.0 | ! |
| ! D43 | D(6,5,9,11)    | 165.9705  | -DE/DX = | 0.0 | ! |
| ! D44 | D(6,5,9,12)    | -0.0633   | -DE/DX = | 0.0 | ! |
| ! D45 | D(1,8,10,15)   | 38.822    | -DE/DX = | 0.0 | ! |
| ! D46 | D(1,8,10,43)   | -85.74    | -DE/DX = | 0.0 | ! |
| ! D47 | D(1,8,10,47)   | 153.0761  | -DE/DX = | 0.0 | ! |
| ! D48 | D(17,8,10,15)  | -154.7496 | -DE/DX = | 0.0 | ! |
| ! D49 | D(17,8,10,43)  | 80.6885   | -DE/DX = | 0.0 | ! |
| ! D50 | D(17,8,10,47)  | -40.4955  | -DE/DX = | 0.0 | ! |
| ! D51 | D(5,9,11,16)   | 38.8215   | -DE/DX = | 0.0 | ! |
| ! D52 | D(5,9,11,19)   | 153.0748  | -DE/DX = | 0.0 | ! |
| ! D53 | D(5,9,11,23)   | -85.7425  | -DE/DX = | 0.0 | ! |
| ! D54 | D(12,9,11,16)  | -154.7499 | -DE/DX = | 0.0 | ! |
| ! D55 | D(12,9,11,19)  | -40.4967  | -DE/DX = | 0.0 | ! |
| ! D56 | D(12,9,11,23)  | 80.6861   | -DE/DX = | 0.0 | ! |
| ! D57 | D(8,10,15,13)  | -50.3662  | -DE/DX = | 0.0 | ! |
| ! D58 | D(43,10,15,13) | 70.4251   | -DE/DX = | 0.0 | ! |
| ! D59 | D(47,10,15,13) | -167.0804 | -DE/DX = | 0.0 | ! |
| ! D60 | D(8,10,43,44)  | 176.3371  | -DE/DX = | 0.0 | ! |
| ! D61 | D(8,10,43,45)  | -64.0234  | -DE/DX = | 0.0 | ! |
| ! D62 | D(8,10,43,46)  | 55.3096   | -DE/DX = | 0.0 | ! |
| ! D63 | D(15,10,43,44) | 54.8651   | -DE/DX = | 0.0 | ! |
| ! D64 | D(15,10,43,45) | 174.5046  | -DE/DX = | 0.0 | ! |
| ! D65 | D(15,10,43,46) | -66.1624  | -DE/DX = | 0.0 | ! |
| ! D66 | D(47,10,43,44) | -64.0787  | -DE/DX = | 0.0 | ! |
| ! D67 | D(47,10,43,45) | 55.5608   | -DE/DX = | 0.0 | ! |
| ! D68 | D(47,10,43,46) | 174.8938  | -DE/DX = | 0.0 | ! |
| ! D69 | D(8,10,47,48)  | 59.4631   | -DE/DX = | 0.0 | ! |
| ! D70 | D(8,10,47,49)  | -179.9395 | -DE/DX = | 0.0 | ! |
| ! D71 | D(8,10,47,50)  | -61.0459  | -DE/DX = | 0.0 | ! |
| ! D72 | D(15,10,47,48) | 176.2951  | -DE/DX = | 0.0 | ! |
| ! D73 | D(15,10,47,49) | -63.1076  | -DE/DX = | 0.0 | ! |
| ! D74 | D(15,10,47,50) | 55.7861   | -DE/DX = | 0.0 | ! |
| ! D75 | D(43,10,47,48) | -59.4937  | -DE/DX = | 0.0 | ! |
| ! D76 | D(43,10,47,49) | 61.1037   | -DE/DX = | 0.0 | ! |
| ! D77 | D(43,10,47,50) | -180.0027 | -DE/DX = | 0.0 | ! |
| ! D78 | D(9,11,16,14)  | -50.3637  | -DE/DX = | 0.0 | ! |
| ! D79 | D(19,11,16,14) | -167.0772 | -DE/DX = | 0.0 | ! |
| ! D80 | D(23,11,16,14) | 70.4284   | -DE/DX = | 0.0 | ! |
| ! D81 | D(9,11,19,20)  | 59.4633   | -DE/DX = | 0.0 | ! |
| ! D82 | D(9,11,19,21)  | -179.9394 | -DE/DX = | 0.0 | ! |
| ! D83 | D(9,11,19,22)  | -61.0457  | -DE/DX = | 0.0 | ! |
| ! D84 | D(16,11,19,20) | 176.2949  | -DE/DX = | 0.0 | ! |
| ! D85 | D(16,11,19,21) | -63.1078  | -DE/DX = | 0.0 | ! |
| ! D86 | D(16,11,19,22) | 55.7859   | -DE/DX = | 0.0 | ! |
| ! D87 | D(23,11,19,20) | -59.4925  | -DE/DX = | 0.0 | ! |
| ! D88 | D(23,11,19,21) | 61.1048   | -DE/DX = | 0.0 | ! |
| ! D89 | D(23,11,19,22) | -180.0015 | -DE/DX = | 0.0 | ! |
| ! D90 | D(9,11,23,24)  | 176.3343  | -DE/DX = | 0.0 | ! |
| ! D91 | D(9,11,23,25)  | -64.0263  | -DE/DX = | 0.0 | ! |
| ! D92 | D(9,11,23,26)  | 55.3064   | -DE/DX = | 0.0 | ! |
| ! D93 | D(16,11,23,24) | 54.8613   | -DE/DX = | 0.0 | ! |
| ! D94 | D(16,11,23,25) | 174.5007  | -DE/DX = | 0.0 | ! |
| ! D95 | D(16,11,23,26) | -66.1666  | -DE/DX = | 0.0 | ! |
| ! D96 | D(19,11,23,24) | -64.0825  | -DE/DX = | 0.0 | ! |

|        |                |           |          |     |   |
|--------|----------------|-----------|----------|-----|---|
| ! D97  | D(19,11,23,25) | 55.5569   | -DE/DX = | 0.0 | ! |
| ! D98  | D(19,11,23,26) | 174.8896  | -DE/DX = | 0.0 | ! |
| ! D99  | D(2,13,15,10)  | 32.8129   | -DE/DX = | 0.0 | ! |
| ! D100 | D(35,13,15,10) | 150.6727  | -DE/DX = | 0.0 | ! |
| ! D101 | D(39,13,15,10) | -92.626   | -DE/DX = | 0.0 | ! |
| ! D102 | D(2,13,35,36)  | -64.2477  | -DE/DX = | 0.0 | ! |
| ! D103 | D(2,13,35,37)  | 56.3958   | -DE/DX = | 0.0 | ! |
| ! D104 | D(2,13,35,38)  | 175.716   | -DE/DX = | 0.0 | ! |
| ! D105 | D(15,13,35,36) | 177.2478  | -DE/DX = | 0.0 | ! |
| ! D106 | D(15,13,35,37) | -62.1087  | -DE/DX = | 0.0 | ! |
| ! D107 | D(15,13,35,38) | 57.2115   | -DE/DX = | 0.0 | ! |
| ! D108 | D(39,13,35,36) | 60.2265   | -DE/DX = | 0.0 | ! |
| ! D109 | D(39,13,35,37) | -179.13   | -DE/DX = | 0.0 | ! |
| ! D110 | D(39,13,35,38) | -59.8098  | -DE/DX = | 0.0 | ! |
| ! D111 | D(2,13,39,40)  | 65.5341   | -DE/DX = | 0.0 | ! |
| ! D112 | D(2,13,39,41)  | -175.3624 | -DE/DX = | 0.0 | ! |
| ! D113 | D(2,13,39,42)  | -54.9418  | -DE/DX = | 0.0 | ! |
| ! D114 | D(15,13,39,40) | -169.9088 | -DE/DX = | 0.0 | ! |
| ! D115 | D(15,13,39,41) | -50.8054  | -DE/DX = | 0.0 | ! |
| ! D116 | D(15,13,39,42) | 69.6152   | -DE/DX = | 0.0 | ! |
| ! D117 | D(35,13,39,40) | -57.4993  | -DE/DX = | 0.0 | ! |
| ! D118 | D(35,13,39,41) | 61.6041   | -DE/DX = | 0.0 | ! |
| ! D119 | D(35,13,39,42) | -177.9752 | -DE/DX = | 0.0 | ! |
| ! D120 | D(4,14,16,11)  | 32.81     | -DE/DX = | 0.0 | ! |
| ! D121 | D(27,14,16,11) | -92.6305  | -DE/DX = | 0.0 | ! |
| ! D122 | D(31,14,16,11) | 150.6688  | -DE/DX = | 0.0 | ! |
| ! D123 | D(4,14,27,28)  | 65.5346   | -DE/DX = | 0.0 | ! |
| ! D124 | D(4,14,27,29)  | -175.3622 | -DE/DX = | 0.0 | ! |
| ! D125 | D(4,14,27,30)  | -54.9413  | -DE/DX = | 0.0 | ! |
| ! D126 | D(16,14,27,28) | -169.907  | -DE/DX = | 0.0 | ! |
| ! D127 | D(16,14,27,29) | -50.8038  | -DE/DX = | 0.0 | ! |
| ! D128 | D(16,14,27,30) | 69.617    | -DE/DX = | 0.0 | ! |
| ! D129 | D(31,14,27,28) | -57.498   | -DE/DX = | 0.0 | ! |
| ! D130 | D(31,14,27,29) | 61.6052   | -DE/DX = | 0.0 | ! |
| ! D131 | D(31,14,27,30) | -177.9739 | -DE/DX = | 0.0 | ! |
| ! D132 | D(4,14,31,32)  | -64.2477  | -DE/DX = | 0.0 | ! |
| ! D133 | D(4,14,31,33)  | 56.3957   | -DE/DX = | 0.0 | ! |
| ! D134 | D(4,14,31,34)  | 175.716   | -DE/DX = | 0.0 | ! |
| ! D135 | D(16,14,31,32) | 177.2484  | -DE/DX = | 0.0 | ! |
| ! D136 | D(16,14,31,33) | -62.1081  | -DE/DX = | 0.0 | ! |
| ! D137 | D(16,14,31,34) | 57.2121   | -DE/DX = | 0.0 | ! |
| ! D138 | D(27,14,31,32) | 60.2262   | -DE/DX = | 0.0 | ! |
| ! D139 | D(27,14,31,33) | -179.1304 | -DE/DX = | 0.0 | ! |
| ! D140 | D(27,14,31,34) | -59.8101  | -DE/DX = | 0.0 | ! |

## Repeat geometry optimization for 4a with “tight” convergence constraints

```

*****
Gaussian 03: IA32W-G03RevC.02 12-Jun-2004
              08-Oct-2007
*****
%chk=C:\G03W\Radicals\Oxazene NO\Freq2_Oxaxene_MTDiNO_B3LYP_S1r1.chk
%mem=8MW
%nproc=1
Will use up to 1 processors via shared memory.
-----
# opt=tight freq ub3lyp/6-31g(d) geom=connectivity
-----
Step number 136 out of a maximum of 300
SCF Done: E(UB+HF-LYP) = -1111.85524353 A.U. after 23 cycles
          Convg = 0.8097D-08 -V/T = 2.0093
          S**2 = 2.0340
Annihilation of the first spin contaminant:
S**2 before annihilation 2.0340, after 2.0006

```

| Item                 | Value    | Threshold | Converged? |
|----------------------|----------|-----------|------------|
| Maximum Force        | 0.000001 | 0.000015  | YES        |
| RMS Force            | 0.000000 | 0.000010  | YES        |
| Maximum Displacement | 0.002057 | 0.000060  | NO         |
| RMS Displacement     | 0.000408 | 0.000040  | NO         |

Predicted change in Energy=-8.517637D-10  
 GradGradGradGradGradGradGradGradGradGradGradGradGradGradGradGradGradGradGradGradGrad

Input orientation:

| Center Number | Atomic Number | Atomic Type | Coordinates (Angstroms) |           |           |
|---------------|---------------|-------------|-------------------------|-----------|-----------|
|               |               |             | X                       | Y         | Z         |
| 1             | 6             | 0           | -0.000059               | 0.000118  | -0.000004 |
| 2             | 6             | 0           | -0.000055               | -0.000040 | 1.414126  |
| 3             | 6             | 0           | 1.238069                | -0.000099 | 2.060714  |
| 4             | 6             | 0           | 2.456445                | 0.026621  | 1.378166  |
| 5             | 6             | 0           | 2.414465                | 0.083417  | -0.034202 |
| 6             | 6             | 0           | 1.196754                | 0.055937  | -0.720186 |
| 7             | 1             | 0           | 1.254203                | -0.021954 | 3.146599  |
| 8             | 7             | 0           | -1.210488               | -0.072256 | -0.699288 |
| 9             | 7             | 0           | 3.603619                | 0.184587  | -0.765672 |
| 10            | 6             | 0           | -2.456891               | -0.447946 | 0.038743  |
| 11            | 6             | 0           | 4.871757                | 0.530594  | -0.050501 |
| 12            | 8             | 0           | 3.590477                | 0.250615  | -2.042851 |
| 13            | 6             | 0           | -1.301815               | 0.057968  | 2.200652  |
| 14            | 6             | 0           | 3.780954                | -0.062081 | 2.122724  |
| 15            | 8             | 0           | -2.440103               | 0.160089  | 1.315901  |
| 16            | 8             | 0           | 4.892341                | -0.128274 | 1.201130  |
| 17            | 8             | 0           | -1.235384               | -0.086551 | -1.977916 |
| 18            | 1             | 0           | 1.180701                | 0.077700  | -1.800478 |
| 19            | 6             | 0           | 6.051857                | -0.049864 | -0.825331 |
| 20            | 1             | 0           | 6.081998                | 0.352229  | -1.838241 |
| 21            | 1             | 0           | 6.976269                | 0.204303  | -0.299221 |
| 22            | 1             | 0           | 5.962236                | -1.138005 | -0.874244 |
| 23            | 6             | 0           | 4.958232                | 2.062630  | 0.042918  |
| 24            | 1             | 0           | 5.843235                | 2.349191  | 0.618881  |
| 25            | 1             | 0           | 5.035055                | 2.480923  | -0.964974 |
| 26            | 1             | 0           | 4.071396                | 2.490089  | 0.517863  |
| 27            | 6             | 0           | 3.984129                | 1.101895  | 3.112740  |
| 28            | 1             | 0           | 3.247801                | 1.055849  | 3.922254  |
| 29            | 1             | 0           | 4.983424                | 1.029120  | 3.553984  |
| 30            | 1             | 0           | 3.887425                | 2.076135  | 2.628695  |
| 31            | 6             | 0           | 3.879038                | -1.402544 | 2.874614  |
| 32            | 1             | 0           | 3.114522                | -1.475515 | 3.654153  |
| 33            | 1             | 0           | 3.751514                | -2.235397 | 2.177718  |
| 34            | 1             | 0           | 4.865243                | -1.487051 | 3.342620  |
| 35            | 6             | 0           | -1.376790               | 1.367306  | 3.008008  |
| 36            | 1             | 0           | -0.589414               | 1.409594  | 3.766787  |
| 37            | 1             | 0           | -1.269553               | 2.227382  | 2.341419  |
| 38            | 1             | 0           | -2.348615               | 1.432452  | 3.508092  |
| 39            | 6             | 0           | -1.476100               | -1.144716 | 3.149029  |
| 40            | 1             | 0           | -0.715927               | -1.130638 | 3.937413  |
| 41            | 1             | 0           | -2.461741               | -1.090166 | 3.622439  |
| 42            | 1             | 0           | -1.394519               | -2.098795 | 2.623789  |
| 43            | 6             | 0           | -2.540884               | -1.982578 | 0.073082  |
| 44            | 1             | 0           | -3.408659               | -2.292903 | 0.662785  |
| 45            | 1             | 0           | -2.647337               | -2.360163 | -0.948103 |
| 46            | 1             | 0           | -1.640577               | -2.427872 | 0.504277  |
| 47            | 6             | 0           | -3.659369               | 0.162023  | -0.676730 |
| 48            | 1             | 0           | -3.720022               | -0.199466 | -1.703483 |
| 49            | 1             | 0           | -4.567725               | -0.113555 | -0.133706 |
| 50            | 1             | 0           | -3.570758               | 1.251313  | -0.684980 |

-----
